# 1 LIPID CHAPERONING OF A THYLAKOID PROTEASE WHOSE STABILITY IS 2 MODIFIED BY THE PROTONMOTIVE FORCE

3  
4 Lucas J. McKinnon<sup>1,2</sup>, Jeremy Fukushima<sup>2</sup>, Kentaro Inoue<sup>1</sup>, Steven M. Theg<sup>2</sup>

5 <sup>1</sup>Department of Plant Sciences, University of California, One Shields Avenue, Davis, CA 95616,  
6 USA.

7 <sup>2</sup>Department of Plant Biology, University of California, One Shields Avenue, Davis, CA 95616,  
8 USA.

9

## 10 Abstract

11 Protein folding is a complex cellular process often assisted by chaperones but can also be  
12 facilitated by interactions with lipids. Disulfide bond formation is a common mechanism to  
13 stabilize a protein. This can help maintain functionality amidst changes in the biochemical milieu  
14 which are especially common across energy-transducing membranes. Plastidic Type I Signal  
15 Peptidase 1 (Plsp1) is an integral thylakoid membrane signal peptidase which requires an  
16 intramolecular disulfide bond for *in vitro* activity. We have investigated the interplay between  
17 disulfide bond formation, lipids, and pH in the folding and activity of Plsp1. By combining  
18 biochemical approaches with a genetic complementation assay, we provide evidence that  
19 interactions with lipids in the thylakoid membrane have chaperoning activity towards Plsp1.  
20 Further, the disulfide bridge appears to prevent an inhibitory conformational change resulting  
21 from proton motive force-mimicking pH conditions. Broader implications related to the folding  
22 of proteins in energy-transducing membranes are discussed.

23

24 **Abbreviations:**  $\Delta\psi$ , transmembrane electrical gradient;  $\Delta\text{pH}$ , transmembrane pH gradient;  
25 DGDG, digalactosyl diacyl glycerol; DTT, dithiothreitol; LepB, leader peptidase; MGDG,  
26 monogalactosyl diacyl glycerol; PG, phosphatidyl glycerol; Plsp1, Plastidic type I signal  
27 peptidase 1; pmf, proton motive force; PLs, proteoliposomes; SQDG, sulfoquinovosyl diacyl  
28 glycerol; TTS, thylakoid transfer signal; TPP, thylakoidal processing peptidase.

29

## 30 Introduction

31 Biological membranes form the boundary between cells and their external environment  
32 and are responsible for compartmentalization in eukaryotic cells. Known to be much more than a  
33 passive barrier, membranes carry out a wide range of essential processes for living cells,  
34 including generation and maintenance of electrochemical gradients, perception and transduction  
35 of internal and external signals, transport of biomolecules, and synthesis of lipids. Each of these  
36 diverse biological processes requires integral and peripherally associated membrane proteins.  
37 Due to their tight association with membranes, the structures and functions of membrane proteins  
38 can be influenced by properties of the bilayer such lipid composition, fluidity, charge, and  
39 thickness. Indeed, there is a vast amount of evidence supporting a crucial role of the lipid bilayer  
40 in the function and/or regulation of membrane proteins. First, phospholipids are present in the  
41 structures of numerous membrane proteins and complexes (Lee, 2011) including photosystem II  
42 (PSII) from cyanobacteria (Umena et al., 2011) and spinach (Wei et al., 2016). In many cases,  
43 lipids are well-resolved in protein crystal structures and bind in specific grooves, analogous to  
44 prosthetic groups (Lee, 2004). Second, specific lipid species are required for the activity (Lee,  
45 2004; Soom et al., 2001), proper folding (Dowhan et al., 2004), or membrane insertion (van  
46 Klompenburg et al., 1998) of a variety of membrane proteins. Finally, membrane lipids can

47 influence transmembrane helix packing (Lee, 2011), induce conformational changes of extra-  
48 membrane domains (Hansen et al., 2011), or stimulate oligomerization of membrane proteins  
49 (Stangl and Schneider, 2015). These examples highlight the remarkable versatility of membrane  
50 lipids.

51 In addition to lipids, a fundamental part of the molecular environment of proteins within  
52 energy-transducing membranes is the proton motive force (pmf) consisting of both a proton  
53 gradient ( $\Delta\text{pH}$ ) and an electrical gradient ( $\Delta\psi$ ). Changes in the magnitude of the pmf and/or the  
54 partitioning between  $\Delta\psi$  and  $\Delta\text{pH}$  have the potential to alter protein structure and function in  
55 several ways, for instance, alteration of the protonation state and in turn the polarity of ionizable  
56 side chains (Hamsanathan and Musser, 2018). Consistent with this idea is the observation of  
57 pmf-driven conformational changes in voltage-gated ion channels (Catterall et al., 2017) as well  
58 as pmf-dependent oligomerization of TatA, a membrane protein involved in the transport of  
59 folded proteins in bacteria and chloroplasts via the twin-arginine translocon (Hamsanathan and  
60 Musser, 2018). Thus, the structure and function of membrane proteins can be influenced not only  
61 by lipids in a bilayer but also by a pmf.

62 Thylakoid membranes are the energy-transducing membranes in chloroplasts and  
63 cyanobacteria and are replete with proteins whose structure and function are influenced by lipids  
64 and/or a pmf. For example, the structural stability of light-harvesting LHCII trimers in  
65 proteoliposomes is significantly enhanced by the galactolipid monogalactosyl diacyl glycerol  
66 (MGDG) (Seiwert et al., 2017), which comprises up to 50% of the total lipids found in thylakoid  
67 membranes (Dormann and Benning, 2002). Another example is the membrane protein PsbS  
68 which is influenced by both lipids and the pmf. Specifically, insertion of denatured PsbS into  
69 liposomes made of thylakoid lipids promotes it to fold into the native conformation (Liu et al.,  
70 2016). Furthermore, protonation of two conserved glutamate residues in PsbS in response to a  
71 certain magnitude of  $\Delta\text{pH}$  appears to trigger conformational changes leading to its activation  
72 (Niyogi et al., 2005). A third example is the thylakoid lumen protein violaxanthin deepoxidase  
73 (VDE), in which the catalytic activity (Jahns et al., 2009) and reversible membrane association  
74 (Hager and Holocher, 1993) is  $\Delta\text{pH}$ -dependent. VDE activity is also stimulated in the presence  
75 of liposomes containing MGDG (Latowski et al., 2002) and by exogenous MGDG (Latowski et  
76 al., 2000). Although not an integral membrane protein, VDE still responds to the pmf across  
77 thylakoids and depends on specific lipids within the membrane. These and other examples make  
78 clear the fact that the pmf can serve a broader role than simply providing the energy for ATP  
79 synthesis.

80 The vast majority of chloroplast proteins are encoded in the nuclear genome, synthesized  
81 on cytosolic ribosomes, and are post-translationally targeted to the chloroplast (Shi and Theg,  
82 2013). All known soluble thylakoid lumen proteins (Schubert et al., 2002) and several thylakoid  
83 membrane proteins (Mant et al., 1994; Michl et al., 1994; Rodrigues et al., 2011) are synthesized  
84 as precursors containing bipartite N-terminal transit peptides consisting of a stromal targeting  
85 domain and a thylakoid transfer signal (TTS) in tandem. Homologous to bacterial signal peptides  
86 (Paetzel et al., 2002), the TTS targets the protein to the thylakoid and is cleaved off on the  
87 lumenal side by the integral membrane thylakoidal processing peptidase (TPP), yielding a  
88 mature protein (Albiniak et al., 2012). The major isoform of TPP called Plastidic type I signal  
89 peptidase 1 (Plsp1) and its homolog LepB1 are essential for photoautotrophic growth and  
90 processing of lumen-targeted proteins in plants and cyanobacteria, respectively (Hsu et al., 2011;  
91 Shipman-Roston et al., 2010; Zhibanko et al., 2005). Additionally, Plsp1 can cleave the TTS from  
92 numerous TPP substrates in Triton X-100 micelles (Midorikawa et al., 2014). Lipids and/or the

93 pmf likely influence the structure and activity of Plsp1 given that (i) Plsp1 exhibits a tendency to  
94 bind to thylakoid membranes *in vitro* (Endow et al., 2015), (ii) the majority of the protein resides  
95 in the lumen (Midorikawa et al., 2014) in which the pH fluctuates during photosynthesis  
96 (Shikanai and Yamamoto, 2017), (iii) it cleaves signal peptides at or near the surface of the  
97 membrane (Dalbey et al., 2012), and (iv) exogenous lipids stimulate the activity of the bacterial  
98 Plsp1 homolog leader peptidase (LepB) (Tschantz et al., 1995).

99 Previous biochemical analyses revealed a key role of disulfide bond formation in the  
100 structure and function of Plsp1 (Midorikawa et al., 2014). An angiosperm-specific Cys pair  
101 (C166 and C286) residing in the luminal domain of Plsp1 form an allosteric disulfide bond  
102 required for Plsp1 *in vitro* activity (Midorikawa et al., 2014). Using a homology-based structural  
103 model, disulfide bond reduction was suggested to alter the conformation of Plsp1 leading to the  
104 observed loss of activity (Midorikawa et al., 2014). Thus, it was concluded that disulfide bond  
105 formation, often referred to as oxidative folding (Kieselbach, 2013), plays a key role in  
106 maintaining the active conformation of Plsp1 (Midorikawa et al., 2014). This was interesting  
107 given that *E. coli* LepB lacks the corresponding Cys pair (Midorikawa et al., 2014) and contains  
108 another non-conserved Cys pair that are dispensable for activity (Sung and Dalbey, 1992).

109 In this study, we originally sought to confirm that oxidative folding is required for Plsp1  
110 to function *in vivo* and subsequently determine its biological role. Using a genetic  
111 complementation assay and a variety of biochemical approaches, we instead discovered that the  
112 disulfide bond in Plsp1 is not essential *in vivo* and that membrane lipids alone facilitate the  
113 proper folding and, in turn, activity of Plsp1. We also provide evidence that, while the disulfide  
114 bridge is not required for Plsp1 activity *in vivo*, it assists in the maintenance of catalytic activity  
115 in a relatively acidic environment such as that found in the thylakoid lumen during illumination.  
116 Our results present Plsp1 as a novel example of a membrane protein for which lipids act as  
117 folding chaperones. In addition, Plsp1 represents the first example, to our knowledge, of a  
118 protein that must maintain activity in both stabilizing and destabilizing environments established  
119 by the cycle of diurnal energization of the thylakoid membrane. Broader implications related to  
120 the folding and homeostasis of proteins in energized membranes are discussed.

## 121 122 **Results**

### 123 124 ***Disulfide bond reduction causes a conformational change in Plsp1***

125 Prior to this study, we lacked direct evidence that the loss of activity observed *in vitro*  
126 after disulfide bond reduction is related to structural changes within Plsp1. Two approaches were  
127 taken to investigate this issue.

128 Our first approach compared the susceptibility of the oxidized and reduced forms of  
129 Plsp1 to the protease thermolysin. DTT could not be used as the reductant in this experiment  
130 since it inhibited the protease activity of thermolysin (Fig. S1) due to its ability to chelate the  
131 critical Zn<sup>2+</sup> cofactor (Cornell and Crivaro, 1972; Pretzer et al., 1992). Instead, TCEP (tris-2-  
132 carboxyethylphosphine), which also diminishes the activity of Plsp1 *in vitro* (Fig. S1), was used  
133 as the reductant. Plsp1 extracted from pea thylakoid membranes with Triton X-100 was treated  
134 with or without TCEP, followed by incubation with or without thermolysin. Sample aliquots  
135 taken over time were examined by SDS-PAGE and immunoblotting using an antibody raised  
136 against the pea ortholog of Plsp1 (Midorikawa et al., 2014). The extracted form of Plsp1  
137 remained relatively stable after 30 minutes at room temperature regardless of TCEP treatment  
138 (Fig. 1A). In the presence of thermolysin, Plsp1 was degraded in a time-dependent manner, and

139 this degradation was accelerated if Plsp1 was pre-treated with TCEP (Fig. 1A). TCEP-treated  
140 Plsp1 migrated more slowly than un-treated Plsp1 on non-reducing SDS-PAGE (Fig. 1B),  
141 confirming complete reduction of the disulfide bond (Midorikawa et al., 2014).

142 Our second approach to relate Plsp1's disulfide to its conformation was based on the  
143 intrinsic fluorescence of the three native Trp residues in a purified form of Plsp1 containing an  
144 N-terminal T7 tag. When excited with 285nm light, Plsp1 exhibited strong fluorescence in the  
145 range of 300-400nm with a  $\lambda_{\max}$  of  $350 \pm 2\text{nm}$  (Fig. 1C), which is characteristic of a solvent-  
146 exposed Trp side chain. After treatment with DTT, the fluorescence spectrum of Plsp1 exhibited  
147 a similar shape and  $\lambda_{\max}$  ( $349 \pm 2\text{nm}$ ) but with a significant decrease in emission intensities (Fig.  
148 1C). The decrease in fluorescence intensity cannot be attributed to denaturation and aggregation  
149 of Plsp1 since the DTT-treated enzyme remains completely soluble (Fig. S1). Since the quantum  
150 yield often decreases when a Trp side chain shifts from a buried to a more solvent-exposed local  
151 environment (Teale, 1960), reducing the disulfide bond in Plsp1 likely causes a conformational  
152 change which increases the exposure of one or more Trp residues to the bulk solvent. As  
153 expected, the activity of the enzyme used for the fluorescence experiments is abolished by DTT  
154 (Fig. 1D). Taken together, the results presented in Fig. 1 provide direct evidence that the loss of  
155 Plsp1 activity upon disulfide bond reduction can be attributed to a conformational change to an  
156 inactive structure.

157

### 158 ***Plsp1 Cys form a disulfide bond in intact chloroplasts***

159 Previous work showed that Cys166 and Cys286 can form an intramolecular disulfide  
160 bond in a recombinant form of Plsp1 as well as in Plsp1 in isolated chloroplasts from pea and  
161 Arabidopsis (Midorikawa et al., 2014). To confirm that this disulfide bond forms *in vivo*, we  
162 analyzed the *in vivo* redox state of the Cys in Plsp1 using a thiol labeling assay (Shapiguzov et  
163 al., 2016). The endogenous Plsp1 protein in Arabidopsis plants could not be monitored due to a  
164 low level of expression. Instead, we transiently expressed T7-tagged Plsp1 in *Nicotiana*  
165 *benthamiana* leaves to achieve high expression and facilitate detection. A genetic  
166 complementation experiment confirmed that T7-Plsp1 is indeed functional (Fig. S2).

167 Intact chloroplasts were isolated from leaves after infiltration with *Agrobacterium*  
168 containing a plasmid encoding T7-Plsp1 or after a mock infiltration and were used to probe the  
169 redox state of the two Cys residues in Plsp1. After blocking free thiol groups with N-ethyl  
170 maleimide (NEM), proteins were treated with TCEP followed by addition of  
171 methoxypolyethylene glycol maleimide (mPEG-MAL), which confers a large size shift upon  
172 labeling the newly-exposed thiols. A portion of T7-Plsp1 displays a mobility shift from  $\sim 27\text{-kDa}$   
173 to  $\sim 50\text{-kDa}$  when TCEP treatment precedes labeling with mPEG-MAL (Fig. 2A). This size shift  
174 is comparable to that observed when both Cys residues of *in vitro* translated Plsp1 are labeled  
175 with mPEG-MAL (Fig. S3). We therefore interpret the 50-kDa band as T7-Plsp1 with mPEG-  
176 MAL on both Cys residues. This size shift was detected regardless of NEM treatment (Fig. 2A)  
177 which is expected if Plsp1 is initially disulfide bonded. As a control, the single Cys residue in  
178 OE23 was labeled by mPEG-MAL but only when NEM was omitted from the initial chloroplast  
179 lysis and membrane solubilization (Fig. 2A) confirming that the NEM successfully blocked free  
180 thiols in the initial steps of the experiment.

181 A minor proportion of T7-Plsp1 was shifted to  $\sim 37\text{-kDa}$  (Fig. 2A) after TCEP + mPEG-  
182 MAL treatment. In addition, a significant proportion of T7-Plsp1 was unlabeled even without  
183 NEM treatment. We attribute these results to incomplete mPEG-MAL labeling of thiols and/or  
184 disulfide bond reduction by TCEP, and we interpret the  $\sim 37\text{-kDa}$  band as T7-Plsp1 with mPEG-

185 MAL on one Cys because the mobility is similar to that of the labeled forms of *in vitro* translated  
186 single Cys Plsp1 mutants (Fig. S3), Regardless of the technical limitations, it is clear that a  
187 significant portion of the T7-Plsp1 population in intact chloroplasts contains an intramolecular  
188 disulfide bond.

189

### 190 ***Processing activity is required for the in vivo function of Plsp1***

191 Lack of Plsp1 leads to defective thylakoid development as well as the accumulation of  
192 unprocessed forms of several thylakoid lumen proteins (Midorikawa and Inoue, 2013; Shipman-  
193 Roston et al., 2010). In addition, overexpression of either of the other two Plsp isoforms (i.e.,  
194 Plsp2A and Plsp2B) does not rescue the *plsp1-1* T-DNA knockout mutant (Hsu et al., 2011).  
195 These findings led to the conclusions that (i) Plsp1 is the major isoform of the thylakoidal  
196 processing peptidase and (ii) Plsp1 is responsible for cleaving most, if not all, TTSs in  
197 chloroplasts. To confirm that Plsp1 directly cleaves thylakoid-transfer signals *in vivo*, we tested  
198 whether changing the catalytic nucleophile Ser142 (Midorikawa et al., 2014) to Ala (i.e., S142A)  
199 would disrupt the function of Plsp1 using a genetic complementation approach, as described  
200 previously (Endow and Inoue, 2013). For two independent S142A lines, we observed albino  
201 hygromycin-resistant seedlings exhibiting a stunted growth phenotype similar to the *plsp1-1*  
202 mutant (Fig. S4). Genomic PCR confirmed that the albino hygromycin-resistant seedlings carried  
203 the *CITRINE-PLSP1* transgene in the *plsp1-1* mutant background (Fig. S4). SDS-PAGE and  
204 immunoblotting analysis of total seedling extracts revealed that the Citrine-Plsp1 protein was  
205 synthesized in each of the transgenic lines (Fig. S4). Furthermore, PsbO and Toc75 both  
206 accumulated as unprocessed forms in the albino S142A seedlings as in the *plsp1-1* mutant (Fig.  
207 S4). Taken together, these data show that expression of a non-catalytic Plsp1 variant cannot  
208 rescue the *plsp1-1* mutant providing a necessary control for the experiments described in Fig. 3.

209

### 210 ***Expression of redox-inactive Plsp1 variants rescues the plsp1-1 mutant***

211 To assess whether the *in vivo* activity of Plsp1 requires a disulfide bond, we tested the  
212 functionality of Citrine-tagged Plsp1 variants in which one or both Cys are replaced by Ala.  
213 Surprisingly, plants carrying a *CITRINE-PLSP1-CA* (C166A, C286A, or C166A/C286A)  
214 transgene in the *plsp1-1* mutant background exhibited a wild type-like phenotype (Fig. 3A and  
215 3B). We isolated three independent complemented lines for each construct and checked for the  
216 presence of Cys/Ala mutations in *PLSP1* by a restriction digest of genomic PCR products (Fig.  
217 3C). Chloroplasts from each of the complemented lines expressed Citrine-Plsp1 and lacked the  
218 endogenous form of Plsp1 (Fig. 3D). Notably, the expression of the Citrine-Plsp1 protein was  
219 highly variable across the transgenic lines ranging from close to endogenous Plsp1 levels (e.g.  
220 C166A #1) to a level well above the dynamic range of detection (e.g. C286A #2). In addition, the  
221 wild-type Citrine-Plsp1 and endogenous Plsp1 displayed redox-dependent mobility on SDS-  
222 PAGE whereas the mobility of the Citrine-Plsp1-CA proteins was not redox-dependent (Fig. S5).  
223 This indicates that changing one or both Cys in Plsp1 to Ala prevents disulfide bond formation.

224

225 All twelve complemented lines we isolated were homozygous for the *plsp1-1* null allele,  
226 but five of them were hemizygous for the *CITRINE-PLSP1* transgene (Fig. S5). For each of these  
227 lines, the ratio of hygromycin-resistant to-susceptible seedlings was ~3:1 (Fig. S5), consistent  
228 with segregation for a single transgene insertion. Albino hygromycin-resistant seedlings were  
229 never observed. Genomic PCR analysis allowed us to determine that the green wild type-like  
seedlings were complemented, and the albino seedlings were non-transgenic *plsp1-1* mutants.

230 Results of our genetic complementation assays clearly showed that while a disulfide bond is  
231 required for *in vitro* activity, it is not essential for Plsp1 activity *in vivo*.

232

### 233 ***Wild type and redox-inactive Citrine-Plsp1 variants have comparable activity in chloroplasts***

234 To qualitatively examine the *in vivo* activity of Citrine-Plsp1-CA proteins, we checked  
235 the sizes of two Plsp1 substrates in isolated chloroplasts. Chloroplasts from wild-type plants and  
236 those from all plants complemented with Citrine-Plsp1 accumulated PsbO and Toc75 in their  
237 mature/processed forms (Fig. 4A). Unprocessed forms of these proteins were only detected in  
238 total protein extracts from *plsp1-1* mutant seedlings (Fig. 4A).

239 Because most of our complemented lines expressed Citrine-Plsp1 at high levels (Fig.  
240 3D), and high concentrations of Plsp1 exhibit detectable activity despite DTT treatment (Fig.  
241 S6), we sought to rule out the hypothesis that the *in vivo* processing activity in chloroplasts  
242 containing Citrine-Plsp1-CA mutant proteins is low but sufficient for normal thylakoid  
243 development. To that end, we quantitatively examined the activities of each Citrine-Plsp1-CA  
244 protein in intact chloroplasts using an *in vitro* protein import assay with radiolabeled precursor  
245 proteins. We used the precursors of Arabidopsis PsbP1 and *Silene pratensis* plastocyanin (Last  
246 and Gray, 1989) as model substrates for the two thylakoid lumen protein transport pathways  
247 cpTAT and cpSEC1, respectively (Albinak et al., 2012). For time course experiments, we chose  
248 one Citrine-Plsp1 wild-type line and one transgenic line representing each Citrine-Plsp1 Cys/Ala  
249 mutation. SDS-PAGE and autoradiography of import products showed that all lines imported  
250 prPsbP and prPC and processed each to their mature forms at similar rates (Fig. 4B).

251 Quantification of signals in the autoradiograms revealed that the rate at which mature PsbP or PC  
252 accumulate is comparable between each of the CA mutant lines and the wild-type control (Fig.  
253 4C). The total amount of imported PsbP (intermediate + mature) was also comparable over time  
254 (Fig. 4C), indicating that chloroplasts from all of the tested lines have similar import efficiencies.  
255 Considering that the Citrine-Plsp1 expression level varied between the lines used in this  
256 experiment, it appears that the *in vivo* processing rate is not tightly-coupled to the level of Plsp1  
257 in the thylakoid. Based on these data, we conclude that even without a disulfide bond, Plsp1 has  
258 a normal level of activity *in vivo*.

259

### 260 ***Thylakoid membrane-bound Plsp1 activity is insensitive to DTT***

261 Plsp1 localizes to the thylakoid membrane and presents its catalytic site in the lumen (Kirwin  
262 et al., 1988; Shipman and Inoue, 2009). In order to explain its activity *in vivo*, we reasoned that  
263 either one or more protein-protein interactions in the thylakoid membrane or interactions with  
264 the lipid bilayer compensate for a lack of disulfide bond formation. We developed an assay to  
265 directly measure Plsp1 activity in native thylakoids using a membrane permeabilization technique  
266 (Ettinger and Theg, 1991). Specifically, treatment of isolated thylakoid vesicles with a low  
267 concentration of Triton X-100 leads to the release of soluble proteins from the lumen (Ettinger  
268 and Theg, 1991). Similarly, we expected that the same low detergent concentration would allow  
269 exogenously added substrates to diffuse inside and be processed by Plsp1. Figure 5A (top panel)  
270 shows the typical fractionation pattern of proteins from pea chloroplasts after hypotonic lysis  
271 followed by treatment of membranes with either a low (0.04%) or high (0.25% v/v)  
272 concentration of Triton X-100. The low Triton X-100 treatment released a small amount of the  
273 luminal proteins PsbO and plastocyanin, but Plsp1 remained tightly bound to the membrane  
274 (Fig. 5A). In contrast, the high Triton X-100 treatment completely solubilized Plsp1 (Fig. 5A).

275 Having established reproducible conditions for preparing membrane-bound and detergent-  
276 solubilized forms of Plsp1, we tested the effect of DTT on processing activity in each case using  
277 prPsbP as the substrate. Figure 5B shows the results of *in vitro* processing experiments using  
278 intact or permeabilized (0.04% Triton X-100) thylakoids and thylakoid extract (0.25% Triton X-  
279 100 supernatant). The effects of the different treatments on processing activity in intact  
280 thylakoids are consistent with proteins that traverse the thylakoid membrane via the cpTAT  
281 pathway, of which PsbP is a well-studied substrate (Braun and Theg, 2008). Specifically, both  
282 gramicidin and the antibody against Hcf106 (Fig. 5B and 5C) inhibited activity by ~70% due to  
283 their effects on protein transport. Gramicidin forms pores in membranes (Kelkar and  
284 Chattopadhyay, 2007) which dissipates the pmf on which cpTAT transport depends, and the  $\alpha$ -  
285 Hcf106 antibody inhibits cpTAT transport by binding to the Hcf106 subunits of the cpTAT  
286 translocon (Rodrigues et al., 2011). Interestingly, DTT inhibited processing activity in intact  
287 thylakoids by ~40%. It is possible that DTT slightly inhibits the processing activity of Plsp1 in  
288 intact thylakoids, but we hypothesize that other non-specific effects are more likely. Resistance  
289 to thermolysin confirmed that the processed form of PsbP had been successfully transported into  
290 the lumenal compartment of the thylakoid vesicles (Fig. 5B).

291 Processing activity in permeabilized thylakoids relied on simple diffusion of the substrate into  
292 the thylakoid vesicles as evidenced by thermolysin susceptibility of processed PsbP and a  
293 negligible effect of the  $\alpha$ -Hcf106 antibody (Fig. 5B). Importantly, DTT did not affect activity in  
294 permeabilized thylakoids (Fig. 5B), providing further support that the thylakoid membrane-bound  
295 form of Plsp1 is active without a disulfide bond. Gramicidin inhibited processing activity by  
296 ~45% (Fig. 5B and 5C) which may be due to unspecified direct or indirect effects on the  
297 structure of Plsp1. As expected, the activity in thylakoid extracts was completely inhibited by  
298 DTT (Fig. 5B and 5C).

299 We also used this assay system with Citrine-Plsp1-complemented plants (wild type and  
300 C166A/C286A). Permeabilized thylakoids from both genotypes processed prPsbP to the mature  
301 form, were unaffected by DTT, and were completely inhibited by the type I signal peptidase  
302 inhibitor Arylomycin A2 (Paetzel, 2014) (Fig. S7). As expected, processing activity in the wild-  
303 type thylakoid extracts was completely inhibited by DTT and Arylomycin A2 (Fig. S7). In  
304 comparison, thylakoid extracts containing Citrine-Plsp1-C166A/C286A lacked detectable  
305 activity even in the absence of DTT (Fig. S7). The above results (Fig. 5 and Fig. S7), as well as  
306 our genetic complementation data (Fig. 3 and Fig. S4), provide compelling evidence that Plsp1  
307 requires a disulfide bond for activity only when it is taken out of its native context.

308

### 309 ***Compensation for lack of a disulfide bond in Plsp1 is not due to a stable association with*** 310 ***PGRL1***

311 The experiments described in Fig. 5 cannot distinguish between effects of protein-protein  
312 interactions or lipid interactions. More than 50% of the total Plsp1 pool in thylakoids forms a  
313 stable complex with PGRL1 (Endow and Inoue, 2013), a key component of antimycin A-  
314 sensitive cyclic electron flow around photosystem I (Strand et al., 2016). All Plsp1 substrates  
315 examined accumulate as their mature forms in chloroplasts lacking PGRL1 (Endow and Inoue,  
316 2013), but Plsp1 is presumably oxidized in the mutant chloroplasts. Two-dimensional blue-  
317 native/SDS-PAGE followed by immunoblotting showed that a portion of the Citrine-Plsp1 and  
318 PGRL1 pools co-migrate despite changing the Cys in Plsp1 to Ala (Fig. 6A), suggesting that the  
319 stable association does not require a disulfide bond in Plsp1. We therefore hypothesized that the  
320 interaction with PGRL1 might keep the reduced form of Plsp1 catalytically active.

321 To test this hypothesis, prPsbP was imported into Col-0 wild type chloroplasts or those  
322 from the *pgrllab* knock out mutant (Endow and Inoue, 2013) after pre-treatment of chloroplasts  
323 with or without DTT. If PGRL1 maintains Plsp1 activity, we expected that PsbP would either (i)  
324 accumulate exclusively as the intermediate form or (ii) be processed to the mature form more  
325 slowly after treatment with DTT in *pgrllab* chloroplasts. However, both the intermediate and  
326 mature forms of PsbP accumulated at similar rates in the two genotypes regardless of DTT  
327 treatment (Fig. 6B and 6C). The total amount of imported PsbP was also similar between both  
328 genotypes (Fig 6C). Immunoblotting confirmed that the *pgrllab* mutant chloroplasts lacked  
329 detectable PGRL1 protein and that the DTT pre-treatment of chloroplasts completely reduced  
330 Plsp1 (Fig. 6D). Notably, DTT pre-treatment increased the total amount of PsbP that was  
331 imported (Fig. 6C), an effect first observed for import of the ferredoxin precursor into Pea  
332 chloroplasts (Pilon et al., 1992). This is most likely due to reductive enhancement of components  
333 of the import apparatus (Bolter et al., 2015). Based on these data, we concluded that the  
334 association with PGRL1 does not compensate for the lack of a disulfide bond in Plsp1.

335

### 336 ***A Lipid Bilayer Abrogates the Effect of DTT on Plsp1 Activity***

337 Having shown that membrane-embedded Plsp1 is not stabilized against reductants by  
338 interaction with PGRL1, we sought to test whether this stability was imparted by the membrane  
339 environment itself. As pointed out by Hamsanathan and Musser (2018), it is well known that  
340 membrane proteins can lose their activities upon removal from membranes. We asked if this  
341 would translate into solubilized Plsp1 maintaining its structure in the presence of reductants upon  
342 reconstitution into membranes. As a first attempt to answer this question, we reconstituted  
343 purified Plsp1 into lipid vesicles prepared from *E. coli* total lipid extract. As seen in Figure S8,  
344 this led to a Plsp1 sample that retained approximately 40% of its activity upon reduction with  
345 DTT. Encouraged by these results and recognizing the different chemical natures of the lipids in  
346 *E. coli* and thylakoids, we repeated these experiments using liposomes composed of MGDG,  
347 DGDG, SQDG, and PG, the four major diacylglycerolipids found in thylakoid membranes  
348 (Webb and Green, 1991). After detergent removal, Plsp1 was recovered in the pelleted liposomes  
349 and remained so after treatment of the proteoliposomes (PLs) with sodium carbonate (Fig. 7A).  
350 Under non-reducing conditions, Plsp1 exhibited a faster migration on SDS-PAGE, indicating the  
351 presence of the disulfide bond (Fig. 7A). These results provide evidence that Plsp1 was  
352 successfully reconstituted into liposomes and that it was in the expected redox state.

353 T7-Plsp1 exhibited differential sensitivity to thermolysin in the presence and absence of  
354 Triton X-100 (Fig. 7B). In the absence of Triton X-100, a portion of wild-type Plsp1 in PLs was  
355 completely resistant to thermolysin, and a portion was truncated to a ~22-kDa degradation  
356 product (Fig. 7B, left panel). The degradation product is similar in size to that observed when  
357 endogenous Plsp1 is subject to thermolysin treatment (Endow et al., 2015; Shipman-Roston et  
358 al., 2010) and likely represents an N-terminal truncation up to the transmembrane region with the  
359 catalytic domain of Plsp1 facing inside the vesicle lumen. The portion that is completely resistant  
360 to thermolysin likely represents Plsp1 with the tightly-folded oxidized catalytic domain facing  
361 the bulk solvent. This is comparable to the observation that Plsp1 can associate with the *cis* face  
362 of isolated thylakoids *in vitro* such that the catalytic domain is resistant to thermolysin (Endow et  
363 al., 2015). In the presence of Triton X-100, full-length Plsp1 was completely removed by  
364 thermolysin, and a similar ~22-kDa degradation product representing the tightly-folded catalytic  
365 domain was observed (Fig. 7B, left panel). Purified Plsp1 in 0.25% Triton X-100 was degraded  
366 by thermolysin with degradation products of ~22-kDa and ~20-kDa appearing in most



367 experiments (Fig. 7B, left panel). The observation that reconstituted Plsp1 is not completely  
368 degraded after bilayer solubilization may be due to differences in Plsp1 folding or thermolysin  
369 activity in 2% versus 0.25% Triton X-100, or the presence of lipids in the solubilized  
370 proteoliposomes.

371 We carried out processing assays using reconstituted Plsp1 and purified Plsp1 in Triton  
372 X-100 to test whether the lipid bilayer mitigates the effect of DTT on Plsp1 activity.  
373 Interestingly, reconstituted Plsp1 exhibited processing activity that was insensitive to DTT (Fig.  
374 7C and 7D). Upon solubilization of PLs with Triton X-100, the processing activity of wild-type  
375 Plsp1 was inhibited by DTT to a similar extent as the non-reconstituted form (Fig. 7C and 7D).  
376 These results are consistent with those obtained from *in vitro* processing assays using  
377 permeabilized thylakoids and thylakoid extracts from the *plsp1-1*-complemented Arabidopsis  
378 plants (Fig. S7). These data indicate that integration into liposomes composed of native thylakoid  
379 diacyl lipids renders oxidized Plsp1 activity insensitive to reducing agents.

380

### 381 ***Chaperoning activity of the lipid environment mediates recovery of activity in non-disulfide*** 382 ***bonded Plsp1***

383 We were curious whether the lipid environment only allowed for the maintenance of  
384 Plsp1 activity in the presence of reductant, or whether it would mediate the folding of the protein  
385 from an inactive conformation. To this end, we reconstituted Plsp1 into PLs after its inactivation  
386 by reduction of the detergent-solubilized form. Remarkably, Plsp1 regained significant activity  
387 after reconstitution, and this was minimally affected by DTT (Figure S9C and S9D). In addition,  
388 this form of Plsp1 was sensitive to thermolysin similar to the oxidized form (Figure S9A) and  
389 remained in a reduced state after the reconstitution procedure (Figure S9B). Although  
390 solubilization of PLs with Triton X-100 slightly decreased the activity of the oxidized form of  
391 Plsp1 (Figure 7D), the decrease in activity was significantly greater for the reduced form of  
392 Plsp1 (Figure S9D). Interestingly, DTT inhibited activity when the PLs had been solubilized  
393 with Triton X-100 despite the fact the Plsp1 was fully reduced at the end of the reconstitution  
394 procedure (Figure S9C and S9D). Our interpretation is that a portion of the reconstituted Plsp1  
395 had become oxidized in between resuspension of PLs in buffer and the addition of substrate (i.e.,  
396 ~3.5 hours). These results indicate that reduced Plsp1, which had adopted an inactive  
397 conformation in its reduced state, had been refolded upon incorporation into PLs, suggesting that  
398 the lipid environment provides chaperoning activity directed towards this protein.

399 We also tested the effect of reconstitution into PLs of the C286A mutant of Plsp1  
400 described above. With one of the two cysteines missing this protein cannot form a disulfide  
401 bond, and consequently, displayed no processing activity in its solubilized form (Midorikawa et  
402 al., 2014) (see also Fig. S9). As with wild-type Plsp1, the C286A mutant protein was recovered  
403 in the PL pellet after reconstitution and was not extracted by carbonate washing (Fig. 7A). As  
404 expected, its mobility on SDS-PAGE was not altered by treatment with a reducing agent,  
405 indicating a lack of a disulfide bond (Fig. 7A). Remarkably, the reconstituted C286A mutant  
406 exhibited processing activity in the PLs, indicating that it was folded by its association with the  
407 membrane bilayer. This activity was, of course, insensitive to DTT, but was completely  
408 abolished by solubilization of the liposomes with Triton X-100 (Fig. 7C and 7D). In aggregate,  
409 our experiments with PLs indicate that integration into liposomes composed of native thylakoid  
410 diacyl lipids renders Plsp1 activity insensitive to reducing agents and can also facilitate folding  
411 from an inactive to an active conformation in the absence of a disulfide bond.

412

413 ***The disulfide bridge in Plsp1 may impart conformational stability during the diurnal***  
414 ***light/dark cycle.***

415 Our experiments suggest that the disulfide bridge that stabilizes the active conformation  
416 of Plsp1 may be superfluous while it is in a membrane environment. Yet, the placement of the  
417 bridging cysteines is invariant in all the angiosperms (Midorikawa et al., 2014), suggesting some  
418 evolutionary pressure to form the disulfide in these plants. We recognized that Plsp1's  
419 environment is not static, and that it likely changes during the day/night cycle of membrane  
420 energization. Specifically, the thylakoid membrane goes from a non-energized to an energized  
421 state with the imposition of the pmf in the light, and the lumen pH changes from approximately 8  
422 in the dark to ~6 or less under illumination (Kieselbach, 2013). In testing the importance of this,  
423 we found that the peptidase activity of T7-Plsp1-C286A in PLs at pH 8 was similar to that of  
424 wild-type Plsp1 (Fig. 7C and 7D). When assayed at pH 5.6 however, the activity of the C286A  
425 variant in PLs was significantly lower than that of the wild-type and was abolished upon  
426 solubilization of the liposomes with Triton X-100 (Fig. 7E and 7F). This suggests that the  
427 disulfide bond in Plsp1 may not be required at night (in the dark) but provides structural stability  
428 to offset the destabilizing effects of, at the least, the pH component of the pmf developed in the  
429 light during the day.

430

431 **Discussion**

432

433 ***Plsp1 exhibits a conformational change upon reduction of its disulfide bond in detergent***  
434 ***micelles***

435 The observed loss of Plsp1 activity upon reduction of the disulfide bond was ascribed to a  
436 conformational change in the enzyme (Midorikawa et al., 2014), consistent with well-  
437 documented examples of conformational differences between oxidized and reduced forms of  
438 proteins (Choi et al., 2001; Gopalan et al., 2006; Nishii et al., 2015; Tanaka and Wada, 1988).  
439 Results of our protease susceptibility assay and tryptophan fluorescence analysis support this  
440 hypothesis. Plsp1 became more susceptible to the protease thermolysin after treatment with a  
441 reducing agent (Fig. 1A), suggesting that additional protease recognition sites became accessible  
442 after the disulfide bond was broken. The significant drop in Trp fluorescence upon treatment  
443 with DTT also indicated that at least one of the three Trp residues in Plsp1 had become more  
444 solvent-exposed. The fluorescence data likely do not reflect a change in the environment of  
445 Trp107 as this residue, which is present just before the transmembrane domain, is located far  
446 from the catalytic domain. Further inspection of the predicted structure presented by Midorikawa  
447 et al (2014) and Endow et al (2015) revealed that, among all three Trp residues, Trp255 is closest  
448 to the active site (~6 Å from the general base Lys192) (data not shown). We therefore speculate  
449 that the loss of activity is related to a structural change near Trp255.

450

451 ***Plsp1 forms a non-regulatory disulfide bond in the thylakoid lumen***

452 Approximately 40% of the confirmed soluble lumen proteome, as well as the luminal  
453 domains of several thylakoid membrane proteins, possess redox-active Cys residues which are  
454 either known or predicted to form disulfide bonds (Brooks et al., 2013; Hall et al., 2010;  
455 Karamoko et al., 2013; Shapiguzov et al., 2016). The results of our *in vivo* thiol-labeling assay  
456 indicate that the two conserved Cys residues in Plsp1 form a disulfide bond in the thylakoid  
457 lumen (Fig. 2A), adding it to this growing list. The classic view of disulfide bonds is that they  
458 enhance the structural stability of proteins (Betz, 1993; Thornton, 1981), but they can also play a

459 role in allosteric regulation, as is the case for most enzymes involved in carbon fixation (Balsera  
460 et al., 2014; Schmidt et al., 2006). Midorikawa et al (2014) hypothesized that the disulfide bond  
461 in Plsp1 is reversible *in vivo* and acts to regulate activity similar to the proposed paradigm of  
462 lumenal redox regulation (Gopalan et al., 2006; Karamoko et al., 2013; Simionato et al., 2015).  
463 However, we do not favor this hypothesis because (i) Plsp1 is functional *in vivo* without a  
464 disulfide bond (Fig. 3) and (ii) the activity of Plsp1 in PLs is unaffected by DTT (Fig. 7D).

465 Oxidation of Plsp1 is expected to occur in the thylakoid lumen due to the nature of its  
466 thylakoid targeting mechanism. Thylakoid transport of Plsp1 is mediated by the cpSEC1  
467 pathway (Endow et al., 2015), which can only accommodate unfolded polypeptides (Albiniak et  
468 al., 2012). The presence of a disulfide bond between C166 and C286 would introduce a large  
469 loop in Plsp1 which would likely make the protein incompatible with the cpSecY translocon.  
470 Although some oxidized lumen proteins are transported in a folded conformation by the cpTAT  
471 pathway (Hall et al., 2010; Schubert et al., 2002) and may be oxidized in the stroma or the  
472 lumen, we predict that membrane translocation must precede oxidation for all cpSEC1 substrates  
473 that possess a disulfide bridge.

474

### 475 ***Lipids have a major effect on Plsp1 structure and function***

476 Our genetic complementation experiments revealed that, in chloroplasts, Plsp1 is  
477 functional without a disulfide bond (Fig. 3), which is in stark contrast to the *in vitro* activity  
478 assay in detergent micelles (Fig. 1D and (Midorikawa et al., 2014). Failure of the active site  
479 S142A Plsp1 variant to complement the null mutant (Fig. S4) confirmed that processing activity  
480 is required for *in vivo* functionality of Plsp1. This also suggested that the other two Plsp isoforms  
481 (Plsp2A/2B) do not compensate for a non-catalytic form of Plsp1, which is in line with previous  
482 data showing that overexpression of Plsp2A or Plsp2B do not rescue the *plsp1-1* null mutant  
483 (Hsu et al., 2011). The surprising result that Plsp1 is catalytically active *in vivo* without a  
484 disulfide bond (Fig. 3 and 4A) suggested that Plsp1 activity is sensitive to reducing agents *in*  
485 *vitro* due to a lack of one or more factors which are present in thylakoids. We hypothesized that  
486 interactions between Plsp1 and another protein and/or lipids in the membrane prevent the  
487 conformational change that leads to a loss of activity.

488 One of the first pieces of evidence supporting this hypothesis was the observation that the  
489 activity of Plsp1 in permeabilized thylakoid vesicles is insensitive to reducing agents (Fig. 5C,  
490 5D, and S7). Additional experiments showed that although the stable association between Plsp1  
491 and PGRL1 is not affected by changing one or both Cys in Plsp1 to Ala (Fig. 6A), this  
492 interaction does not have a role in maintaining the active conformation of Plsp1 (Fig. 6B and  
493 6D). In contrast, reconstitution into liposomes rendered Plsp1 activity insensitive to DTT.  
494 Further, it restored the activity of previously reduced wild type protein (Figure S9), as well as  
495 that of the single Cys Plsp1 mutant (Fig. 7C and 7D). The effect of lipids appears to be  
496 completely reversible since solubilization of PLs with Triton X-100 abolished the activity of a  
497 reconstituted single Cys Plsp1 (Fig. 7C and 7D) as well as the activity of the Cys-less Plsp1  
498 mutant from isolated thylakoids (Fig. S7). Our interpretation of these data is that interactions  
499 between Plsp1 and membrane lipids were necessary to prevent the inhibitory conformational  
500 change and were also sufficient to shift the enzyme from an inactive into a catalytically active  
501 form (Fig. 8). Activity-inducing conformational changes stimulated by association with  
502 membrane lipids are also seen in a class of proteins called bacteriocins (Mel and Stroud, 1993;  
503 van der Goot et al., 1991) and in the K<sup>+</sup> channel Kir2.2 (Hansen et al., 2011). More extreme  
504 cases are seen in the thylakoid membrane protein PsbS and in certain bacterial outer membrane

505  $\beta$ -barrel proteins which can be folded from completely denatured forms into their native  
506 conformations in the presence of liposomes (Kleinschmidt, 2015; Liu et al., 2016). Taken  
507 together, the above-mentioned results lead us to conclude that thylakoid lipids possess folding  
508 chaperone activity towards the luminal catalytic domain of Plsp1 and that the native folding  
509 occurs without, and perhaps prior to, disulfide bond formation.

510 How do lipids make Plsp1 insensitive to the effects of reducing the disulfide bond? The  
511 soluble catalytic domain of *E. coli* LepB spontaneously inserts into membranes via its proposed  
512 hydrophobic membrane association surface (Bhanu and Kendall, 2014; van Klompenburg et al.,  
513 1998). A similar hydrophobic surface is revealed in the predicted structure of Plsp1 and may be  
514 responsible for the propensity of Plsp1 to associate with isolated thylakoid membranes (Endow  
515 et al., 2015). It is possible that insertion of the catalytic domain of Plsp1 into a membrane  
516 rigidifies the tertiary structure and prevents inactivating conformational changes resulting from  
517 disulfide bond reduction. However, there are still likely to be some conformational differences  
518 between oxidized and reduced Plsp1 despite being integrated into a membrane since the protease  
519 susceptibility of the wild type and single Cys variant in PLs are different (Fig. 7B). Another  
520 possible explanation is related to signal peptide-binding. Type I signal peptidases possess a  
521 specific groove into which a signal peptide binds (Paetzel, 2014). Midorikawa et al (2014)  
522 hypothesized that the C-terminal region can sterically interfere with binding of a thylakoid  
523 transfer signal (TTS) when Plsp1 is in a reduced state. If this is true, perhaps the catalytic domain  
524 of Plsp1 inserts into the membrane such that the TTS-binding groove becomes inaccessible to the  
525 C-terminal segment. An analogous example of intramolecular inhibition can be seen in Rv1827  
526 from *Mycobacterium tuberculosis* in which phosphorylation of an N-terminal Thr residue causes  
527 this region of the protein to occlude a surface involved in interactions with binding partners (Nott  
528 et al., 2009).

529 Our results clearly indicate that lipids play an important role in the folding and activity of  
530 Plsp1, but they do not reveal the mechanism by which a membrane facilitates a reversible  
531 transition from an inactive to a catalytically active conformation. In *E. coli*, the multi-pass  
532 lactose permease (LacY) requires interactions with phosphatidylethanolamine (PE) to attain  
533 proper membrane topology and folding of a specific periplasmic domain (Dowhan et al., 2004).  
534 Once LacY is properly folded, interactions with PE are no longer required (Bogdanov and  
535 Dowhan, 1999). The mechanism of lipid-assisted folding of Plsp1 is likely different since Plsp1  
536 only has a single transmembrane alpha helix, and the stimulatory effects of lipids on the single  
537 Cys Plsp1 variant are reversed by solubilization with Triton X-100 (Fig. 7C and 7D). Thus, the  
538 interaction between lipids and Plsp1 in membranes is likely stable as opposed to the transient  
539 nature of the interaction between PE and LacY (Bogdanov and Dowhan, 1999). Perhaps the  
540 mechanism with Plsp1 is similar to that of the membrane insertion of the pore-forming domain  
541 of colicin A (Lakey et al., 1991). Specifically, interactions with negatively charged lipid head  
542 groups are proposed to induce rearrangements of several amphipathic helices leading to exposure  
543 of two hydrophobic helices and subsequent membrane insertion (Lakey et al., 1991). Another  
544 possibility, albeit completely speculative, is that the C-terminal region of Plsp1 occupies the  
545 TTS-binding groove when the disulfide bond is lacking, as suggested above, but is displaced by  
546 lipids during membrane insertion.

547 There are many examples of proteins that require specific lipid molecules for activity  
548 (Hansen et al., 2011; Latowski et al., 2000), structural stability (Seiwert et al., 2017), proper  
549 folding (Dowhan et al., 2004), or membrane insertion (Mel and Stroud, 1993). In some cases,  
550 this is due to properties of the lipid head group such as charge (Hansen et al., 2011; Mel and

551 Stroud, 1993), and in others it is related to biophysical properties of the lipid (Latowski et al.,  
552 2004; Seiwert et al., 2017). Although our current data do not reveal an effect of a specific lipid  
553 molecule, we noted already that liposomes made from thylakoid lipids are significantly more  
554 effective in maintaining Plsp1 activity than are those made from *E. coli* lipids. The most  
555 abundant lipid found in thylakoid membranes (MGDG) is a non-bilayer forming lipid (Dormann  
556 and Benning, 2002) and is important for the structure and function of various thylakoid proteins  
557 (Latowski et al., 2000; Seiwert et al., 2017). MGDG is also the only non-bilayer forming lipid  
558 used in our liposomes. PE is a non-bilayer forming lipid that mediates insertion of *E. coli* LepB  
559 into membranes and is also the most abundant phospholipid in *E. coli* (van Klompenburg et al.,  
560 1998). It would be interesting to test whether non-bilayer forming lipids are important for the  
561 activity and redox-dependency of Plsp1 in PLs by replacing MGDG with PE or  
562 phosphatidylcholine (a bilayer-forming lipid) (Latowski et al., 2004) (van Klompenburg et al.,  
563 1998).

564

565 ***Does oxidative folding stabilize Plsp1 during diurnal changes in the energetic state of the***  
566 ***thylakoid membrane?***

567 In liposome reconstitution experiments, we found that a single Cys Plsp1 mutant has  
568 comparable activity to the wild-type form at pH 8 but lower comparative activity at pH 5.6 (Fig.  
569 7E and F). This suggests that the oxidized form of Plsp1 is more stable than the reduced form  
570 under moderately acidic conditions, despite the fact that the membrane alone is sufficient to  
571 facilitate proper folding. The lumen pH drops when thylakoids are energized and can fluctuate in  
572 response to changes in light intensity (Shikanai and Yamamoto, 2017). Therefore, we  
573 hypothesize that the disulfide bond helps maintain Plsp1 structure and activity in response to  
574 changes in lumen acidity (Fig. 8). By altering protonation states, changes in pH could disrupt  
575 intramolecular interactions or interactions between Plsp1 and lipid head groups that are  
576 important for folding.

577 It is interesting to consider whether this is a property specific to Plsp1 or whether it  
578 applies to other proteins in general. One thought is that it may apply more often in proteins found  
579 in energy-transducing membranes. Such membranes give rise to the possibility that the protein  
580 will be found in rather different environments depending on the state of energization, which  
581 itself depends on external factors, such as availability of substrates for oxidative electron  
582 transport and light for photosynthetic electron transport. Hamsanathan and Musser (2018)  
583 recently considered explicitly that the native environment of a protein embedded in an energetic  
584 membrane would necessarily include the pmf. Indeed, an influence of an electric field on protein  
585 stability has been observed experimentally (Bekard and Dunstan, 2014) and by simulations  
586 (Jiang et al., 2019). Extramembranous effects of the pmf necessarily include the pH values in the  
587 flanking compartments, i.e., the thylakoid lumen in the case of Plsp1. The importance of the  
588 membrane for the folding of Plsp1 is noteworthy given that the active site is most likely near the  
589 membrane/lumen interface (Dalbey et al., 2012).

590 Many enzymes have evolved to function in extreme environments such as high  
591 temperatures, low pH, and high salt concentrations (D'Amico et al., 2003; van den Burg, 2003).  
592 Under such circumstances, those proteins exhibit properties adapted to the particular conditions  
593 encountered, and in fact, those conditions must prevail for maximal activity. For example, the  
594 maximum *in vitro* activities of alpha amylases from a psychrophile and a thermophile were  
595 observed near the temperatures at which the host organisms are adapted to growing (D'Amico et  
596 al., 2003). This reflects the fact that the conditions under which the proteins are evolved to

597 handle are relatively stable. This contrasts to the proteins residing in the energy-transducing  
598 membranes in chloroplasts and photosynthetic bacteria, which can exist in the presence of a  
599 variable pmf (i.e., magnitude and composition) resulting from rapidly changing light conditions  
600 during the day (Armbruster et al., 2017; Shikanai and Yamamoto, 2017) and darkness at night.  
601 Such proteins must be able to adapt to a more variable environment than those that exist under  
602 stable but harsh environments. The oxidative folding of Plsp1 may be an example of such an  
603 adaptation to a changing energy environment. Other examples may include STN7, another  
604 thylakoid membrane protein that is likely stabilized by a luminal disulfide bond (Shapiguzov et  
605 al., 2016). While the disulfide bond in STN7 was proposed to maintain the conformation  
606 necessary for its interaction with the cytochrome b6f complex rather than simply enhancing  
607 protein stability (Shapiguzov et al., 2016), this was not investigated under energizing and non-  
608 energizing conditions.

609 A puzzling feature of oxidative folding of Plsp1 is the fact that it is not conserved  
610 throughout all photosynthetic organisms but is apparently restricted to the angiosperms  
611 (Midorikawa et al., 2014). Homologs of Plsp1 are found in the bacterial plasma membrane and  
612 the mitochondrial inner membrane and cleave signal sequences from proteins targeted to the  
613 periplasm and intermembrane space, respectively (Paetzel et al., 2002). In contrast to these  
614 energy-transducing membranes, thylakoids store a major proportion of their total pmf as a  $\Delta$ pH  
615 (Cruz et al., 2001). While it is tempting to speculate that oxidative folding evolved in Plsp1 as a  
616 general adaptation to functioning in a compartment that undergoes more drastic pH changes, we  
617 recognize that lumen acidification is likely a feature of all organisms that perform oxygenic  
618 photosynthesis, not just the angiosperms. One possibility is that all non-angiosperm Plsp1  
619 orthologs possess a mechanism other than oxidative folding to stabilize the structure amidst pH  
620 changes. Another possibility is that conservation of Cys in angiosperm Plsp1 orthologs is related  
621 to the differences in pmf regulation between angiosperms and other members of the green  
622 lineage (Shikanai and Yamamoto, 2017). While the pmf composition can vary depending on  
623 environmental conditions (Shikanai and Yamamoto, 2017), perhaps the contribution of  $\Delta$ pH is  
624 more variable in angiosperms compared to other photosynthetic organisms.

## 625 626 **Conclusion**

627 The role of lipids in protein structure and function has gained increasing attention in  
628 recent decades. An important role of lipids in folding and structural stability could be a feature of  
629 many integral and peripheral proteins in all membranes, but structural stabilization by disulfide  
630 bonds may be most common in thylakoid membranes. This may be due to the fact that the  
631 thylakoid is the only major energy-transducing membrane which supports a substantial and  
632 highly dynamic pH gradient. Additionally, the apparent lack of major chaperones in the  
633 thylakoid lumen (Kieselbach and Schroder, 2003; Peltier et al., 2002; Schubert et al., 2002) may  
634 necessitate other means to stabilize proteins under periods of stress. While not discussed here,  
635 the electrical component of the pmf can also impact protein functions (Bekard and Dunstan,  
636 2014; Jiang et al., 2019). Overall, we suggest our work has the potential to prompt and inform  
637 future discussions about the role of lipids and electrochemical gradients in protein structure and  
638 function.

## 639 640 **Materials and Methods**

### 641 642 *Antibodies*

643 The Pea Plsp1 antibody was from crude antiserum described previously (Midorikawa et  
644 al., 2014). The antibody against the extreme C-terminus of Arabidopsis Plsp1 was as described  
645 (Shipman and Inoue, 2009). The antibodies against OE23 and Toc75 were as described  
646 previously (Shipman-Roston et al., 2010), and that against Hcf106 was as described (Rodrigues  
647 et al., 2011). The OE33 antibody was a gift from Dr. Hsou-Min Li (Institute of Molecular  
648 Biology, Academia Sinica), that against PGRL1 was from AgriSera (Vännäs, Sweden), that  
649 against GFP was from Santa Cruz Biotech (<https://www.scbt.com>), and the polyclonal T7  
650 antibody was obtained from Millipore (<http://www.emdmillipore.com/US/en>). Western blots  
651 were developed either by enhanced chemiluminescence using Luminata<sup>TM</sup> Crescendo Western  
652 HRP Substrate or colorimetrically using the reagents 5-bromo-4-chloro-3-indolyl phosphate and  
653 nitroblue tetrazolium.

654

#### 655 ***Plant materials***

656 The *pgr11ab* double mutant was generated by a cross between SAIL\_443E10 and  
657 SALK\_059233 (DalCorso et al., 2008). Arabidopsis seeds, ecotype Columbia-0 and the *plsp1-1*  
658 T-DNA mutant (SALK\_106199), were obtained from the Arabidopsis Biological Resource  
659 Center (<https://abrc.osu.edu/>).

660

#### 661 ***DNA constructs***

662 The pUNI51 plasmid containing the coding sequence of Arabidopsis PsbP1 (At1g06680)  
663 was obtained from the Arabidopsis Biological Resource Center. The plasmid containing the  
664 coding sequence of the *Silene pratensis* plastocyanin precursor protein was as described (Last  
665 and Gray, 1989).

666 The cDNAs encoding Plsp1 variants for expression *in planta* were prepared by long  
667 flanking homology PCR as described previously (Endow and Inoue, 2013) using the primers  
668 listed in table S1 with *PLSPI*<sub>1-70</sub>-*CITRINE*-*PLSPI*<sub>71-291</sub> in pMDC32 as the template. PCR  
669 products were recombined into pDONR207 by a BP reaction using Gateway<sup>TM</sup> BP Clonase<sup>TM</sup> II  
670 Enzyme mix (Invitrogen). Gateway<sup>TM</sup> LR Clonase<sup>TM</sup> II Enzyme mix (Invitrogen) was then used  
671 for recombination into pMDC32. Each plasmid was confirmed by DNA sequencing and  
672 transformed into *Agrobacterium* GV3101 cells for plant transformation.

673

#### 674 ***Transient expression in Nicotiana benthamiana***

675 *Agrobacterium* cells carrying the P19 suppressor (Voinnet et al., 2003) in pBIN69 or  
676 *PLSPI*<sub>1-70</sub>-*T7*-*PLSPI*<sub>71-291</sub> in pMDC32 were grown overnight at ~28°C in LB broth with  
677 Kanamycin (25 µg/mL), Rifampicin (35 µg/mL) and Gentamycin (25 µg/mL). Cell cultures were  
678 then diluted in LB with Kanamycin (25 µg/mL) and grown to an OD<sub>600</sub> of ~0.2. Cells were  
679 pelleted at 2500 x g and resuspended in 10 mM MES-KOH pH 5.6, 1 mM MgCl<sub>2</sub>, 0.2% w/v  
680 glucose, 150 µM acetosyringone (induction medium) to an OD<sub>600</sub> of ~0.4. T7-Plsp1 and P19 cell  
681 cultures were mixed at a ratio of 4:1 and incubated with moderate shaking at ~28°C for 2 hours.  
682 Cells were pelleted again at 2500 x g and resuspended in 5% w/v sucrose, 300 µM  
683 acetosyringone (infiltration medium). *Nicotiana benthamiana* leaves were co-infiltrated using a  
684 syringe. After leaf infiltration, the plants were held in dark overnight and returned to a growth  
685 chamber (12 hours light per day, 20°C) for 1-3 days before isolating chloroplasts or thylakoids.

686

#### 687 ***Chloroplast isolations***

688 *Nicotiana benthamiana* chloroplasts were isolated from leaves 2-4 days after infiltration  
689 with *Agrobacterium* cells. Leaves were homogenized in At grinding buffer (50 mM HEPES-  
690 KOH pH 8, 0.33 M sorbitol, 2 mM EDTA, and 0.5% w/v BSA) and filtered through two layers  
691 of Miracloth (Millipore). Pelleted chloroplasts (3000 x g, 4 °C, 3 minutes) were resuspended in a  
692 small volume of At grinding buffer and were carefully layered on top of a 40%/80% Percoll (GE  
693 Healthcare) step gradient (24 mL 40% Percoll on top of 6 mL 80% Percoll, both in At grinding  
694 buffer). After centrifugation at 4000 x g for 10 minutes, the green band at the interface (intact  
695 chloroplasts) was collected and diluted with ~25 mL of import buffer (50 mM HEPES-KOH or  
696 50 mM Tricine-KOH, 0.33 M sorbitol, pH 8). After centrifugation at 2600 x g for 5 minutes, the  
697 intact chloroplasts were resuspended in import buffer, and a small volume was used for  
698 chlorophyll quantification as described (Arnon, 1949). The remainder was centrifuged again at  
699 2600 x g for 5 minutes, and the pellet was resuspended in import buffer to 1 mg Chl/mL.

700 *Arabidopsis thaliana* chloroplasts were isolated from plants grown on phytoagar plates  
701 containing Murashige-Skoog with Gamborg's vitamins (Caisson Laboratories), supplemented  
702 with 1% w/v sucrose, in a manner similar to that for *N. benthamiana* chloroplast isolation. After  
703 filtration through miracloth and centrifugation, chloroplasts were resuspended in At grinding  
704 buffer and layered on top of a 50% continuous Percoll gradient. The green band near the bottom  
705 of the gradient after centrifugation at 8000 x g for 10 minutes was collected into ~25 mL of  
706 import buffer, and chloroplasts were pelleted and washed in import buffer as above. Chlorophyll  
707 quantification and resuspension to 1 mg Chl/mL were carried out as described above.

708 Chloroplasts from *Pisum sativum* plants (Little Marvel) were isolated from 11-14 day-old  
709 plants exactly as was done for Arabidopsis chloroplasts with the following exception: Pea grinding  
710 buffer (50 mM HEPES-KOH pH 8, 0.33 M sorbitol, 2 mM EDTA, 1 mM MgCl<sub>2</sub>, 1 mM MnCl<sub>2</sub>,  
711 and 0.1% w/v BSA) was used in place of At grinding buffer.

712

### 713 ***Protease treatments of thylakoid extracts***

714 Pea chloroplasts isolated as described above were lysed hypotonically at ~1 mg Chl/mL  
715 in 1 mM Tricine-NaOH pH 7, 5 mM MgCl<sub>2</sub> (Buffer A) for 10 minutes on ice in the dark.  
716 Membranes were pelleted at 5000 x g for 5 minutes and were washed three times with 10 mM  
717 Tricine-NaOH pH 7, 5 mM MgCl<sub>2</sub> 0.3 M sucrose (Buffer B). Washed thylakoids were  
718 resuspended in buffer C (50 mM Tricine-NaOH pH 7, 5 mM MgCl<sub>2</sub>, 15 mM NaCl) to ~2 mg  
719 Chl/mL. An equal volume of buffer containing 0.5% v/v Triton X-100 was added, and the  
720 sample was incubated for 10 minutes on ice in the dark. After centrifugation at 100,000 x g, 4°C,  
721 8 minutes (TLS55 rotor), the light-green supernatant (thylakoid extract) was transferred to a new  
722 tube and used immediately for experiments. Thylakoid extracts were pre-treated with or without  
723 10 mM TCEP (Thermoscientific) for 20 minutes on ice in the dark. Aliquots of each were then  
724 mixed with buffer containing CaCl<sub>2</sub> (0.5 mM final) with or without thermolysin (0.1 µg/mL  
725 final). Each reaction mixture was incubated at 25°C. Aliquots taken at 10, 20, and 30 minutes  
726 were mixed with an equal volume of 2X reducing (0.2 M β-ME) sample buffer containing 20  
727 mM EDTA and were boiled for 5 minutes. Samples were then analyzed by SDS-PAGE and  
728 immunoblotting or Coomassie Brilliant Blue staining.

729

### 730 ***Affinity purification of T7-Plsp1***

731 T7-Plsp1<sub>71-291</sub> (T7-Plsp1) was extracted from *N. benthamiana* thylakoids after transient  
732 expression of *PLSPI*<sub>1-70</sub>-*T7-PLSPI*<sub>71-291</sub> in leaves. Leaves were homogenized in Pea grinding  
733 buffer with 244 µM PMSF, filtered through four layers of Miracloth, and the filtrate was



734 centrifuged at 2500 x g for 4 minutes at 4°C. The resulting pellet was washed once with 50 mM  
735 Tricine-NaOH pH 7, 5 mM sorbitol and three times with 50 mM Tricine-NaOH pH 7, 5 mM  
736 MgCl<sub>2</sub>, 0.1 M sorbitol. For extraction with Triton X-100, crude thylakoids were resuspended in  
737 buffer C (see above) at ~2 mg Chl/mL and mixed with an equal volume of the same buffer  
738 containing 0.5% v/v Triton X-100. For extraction with octyl glucoside, crude thylakoids were  
739 resuspended in buffer C at ~1 mg Chl/mL, and solid octyl glucoside was added to 1% w/v. After  
740 mixing at 4°C in the dark for 10-30 minutes, the supernatant containing T7-Plsp1 was obtained  
741 by centrifugation at 30,000 x g for 30 minutes at 4°C. T7-Plsp1 was then bound to T7•Tag  
742 Antibody Agarose (Millipore) for 1-2 hours at 4°C on a BioRad EconoPac 25mL column. The  
743 column was washed once with buffer C containing the appropriate detergent (0.25% v/v Triton  
744 X-100 or 1% w/v octyl glucoside) and was eluted with 0.1 M Glycine-HCl pH 2.2 containing the  
745 same detergent. Elution fractions were collected into 4 M Tris-HCl pH 9.5 (20 µL/mL elution) to  
746 give a final pH of ~7.5. Each fraction was analyzed by SDS-PAGE and Coomassie Brilliant Blue  
747 staining or immunoblotting using the indicated antibodies. Purified T7-Plsp1 was divided into  
748 numerous aliquots which were frozen with liquid N<sub>2</sub> and stored at -80°C.

749

### 750 ***Synthesis of radiolabeled proteins***

751 Proteins were synthesized from plasmid DNA templates in the presence of <sup>35</sup>S  
752 (EasyTag™ EXPRESS35S Protein Labeling Mix, Perkin Elmer) using rabbit reticulocyte lysate  
753 (TnT® Quick Coupled Transcription/Translation System, Promega) according to the  
754 manufacturer's guidelines. Reaction mixtures were quenched with an equal volume of 50 mM L-  
755 Methionine, 15 mM L-Cysteine in 0.1 M HEPES-KOH pH 8, 0.66 M sorbitol and were used for  
756 experiments on the same day.

757

### 758 ***Fluorescence analysis of Plsp1***

759 Aliquots of purified T7-Plsp1 in 1% w/v octyl glucoside were thawed on ice. Emission  
760 spectra of 150 µL samples of T7-Plsp1, T7-Plsp1 with 50 mM DTT, and the corresponding  
761 buffer blanks all prepared in elution buffer neutralized with Tris-HCl were collected using a  
762 Fluorolog spectrofluorometer (Horiba Scientific). The final concentration of T7-Plsp1 in each  
763 sample was ~0.1 µM as determined by comparison to a BSA standard curve on a Coomassie-  
764 stained SDS-PAGE gel. Samples were excited at 285 nm, and slit widths were set to 5nm for  
765 both excitation and emission. T7-Plsp1 with 50 mM DTT was incubated on ice for 20 minutes  
766 prior to collecting the emission spectrum. Spectra of buffer blanks were subtracted from those of  
767 each T7-Plsp1 sample to give corrected emission spectra.

768

### 769 ***Thiol labeling assay***

770 Intact chloroplasts were isolated from *Nicotiana benthamiana* leaves after  
771 *Agrobacterium*-mediated transient expression of Plsp1<sub>1-70</sub>-T7-Plsp1<sub>71-291</sub> as described above or  
772 after infiltration with infiltration medium (mock). Chloroplasts from mock-infiltrated leaves  
773 were subject to mock treatments at each step. Chloroplasts containing T7-Plsp1 were  
774 hypotonically lysed in the presence or absence of 0.1 M NEM and washed two times. Washed  
775 chloroplast membranes were then solubilized for 30 minutes at 28°C with 0.2 M Bis-Tris-HCl  
776 pH 6.5, 2% w/v SDS (labeling buffer) with or without 0.1 M NEM. Proteins were precipitated  
777 with an equal volume of 20% TCA/80% acetone, and pellets were washed 3-4 times with 1 mL  
778 80% acetone. Protein pellets were then resuspended in labeling buffer with or without 2 mM  
779 TCEP and incubated for 20 minutes at 28°C. Labeling buffer with or without

780 methoxypolyethylene glycol maleimide (mPEG-MAL, Sigma) was then added to 10 mM final,  
781 and samples were then incubated for another 2 hours at 28°C. Proteins were again precipitated as  
782 above and were resuspended in 2X sample buffer (0.1 M Tris-HCl pH 6.8, 4% SDS, 20%  
783 glycerol, 0.2% bromophenol blue, 0.2 M  $\beta$ -ME). Samples were analyzed by SDS-PAGE and  
784 immunoblotting.

785

### 786 ***Generation and identification of transgenic Arabidopsis plants***

787 Stable transgenic Arabidopsis plants were obtained by floral dip transformation of  
788 heterozygotes for the *plsp1-1* T-DNA insertion using *Agrobacterium tumefaciens* cell cultures  
789 carrying the indicated transgene in pMDC32. T1 seeds were surface sterilized with 35% bleach,  
790 0.02% v/v Triton X-100 and then screened on MS medium containing 25 or 50  $\mu$ g/mL  
791 hygromycin (Calbiochem). Hygromycin-resistant seedlings (i.e., visible true leaves, roots  
792 penetrating the agar medium, wild type-like appearance) were transferred to soil after 2-3 weeks  
793 and were grown at 16 hours light per day, 20°C. Soil-grown plants were screened by PCR using  
794 whole leaf DNA extracts. Selected plants were propagated to the T3 or T4 generation and used  
795 for experiments.

796

### 797 ***Arabidopsis in vitro import assay***

798 Intact chloroplasts were isolated as described above from 21-24 day-old Arabidopsis  
799 plants grown on MS agar medium at ~20°C under ~60  $\mu$ E light with a 12 hour light per day  
800 regime. 50  $\mu$ L import reactions containing 3mM MgATP, 10  $\mu$ L radiolabeled precursor proteins,  
801 and chloroplasts at 0.22 mg Chl/mL were prepared on ice in the dark. Upon addition of the  
802 radiolabeled proteins, each sample was immediately moved to ambient light (10-30 $\mu$ E) at 20-  
803 22°C and incubated for 5, 10, or 20 minutes. Start times were staggered such that all import  
804 reactions would end at the same time. Samples were then immediately moved to ice in the dark  
805 and layered on top of 35% Percoll cushions in import buffer to re-isolate intact chloroplasts.  
806 After centrifugation at 900 x g, 5 minutes, 4°C, all but ~50  $\mu$ L of each supernatant was removed.  
807 100  $\mu$ L of import buffer was added, and the green pellets were resuspended by pipetting. 100  $\mu$ L  
808 of each sample was then transferred to a new tube and centrifuged again at ~2000 x g, 5 minutes,  
809 4°C. After discarding the supernatants, each green pellet was resuspended in 2X sample buffer  
810 and heated at ~82°C for 5 minutes. The leftover ~50  $\mu$ L solutions were used for chlorophyll  
811 quantification. Samples were analyzed by SDS-PAGE and autoradiography with the loading  
812 normalized based on total chlorophyll. Radioactive bands were quantified using ImageJ 1.5i  
813 (National Institutes of Health). Signals were normalized to that of the Citrine-Plsp1 wild type  
814 sample at 20 minutes.

815

### 816 ***Total protein extraction***

817 Whole seedlings were frozen and homogenized under liquid N<sub>2</sub> followed by suspension and  
818 boiling for ~15 minutes in extraction buffer (0.1 M Tris-HCl pH 6.8, 4% SDS, 15% glycerol, 10  
819 mM EDTA, 2%  $\beta$ -ME). After centrifugation to remove tissue debris, four volumes of 100%  
820 acetone were added to the soluble extract for precipitation at -20°C. Precipitated proteins were  
821 collected by centrifugation, washed with 80% acetone, and resuspended in 8 M urea buffered  
822 with 0.1 M sodium phosphate and 10 mM Tris-HCl, pH 8.6. Total proteins were quantified by  
823 the Bradford assay (Bradford, 1976) using BSA as the standard.

824

### 825 ***In vitro processing assays***

826 A typical 10  $\mu$ L processing assay consisted of 1  $\mu$ L radiolabeled protein, enzyme sample  
827 (purified Plsp1 or crude thylakoid extract), and enzyme buffer with or without various additions  
828 such as DTT. Pre-incubations without substrate were typically carried out on ice for ~30  
829 minutes. Reaction mixtures were incubated at 25-30°C for 30 minutes and quenched by addition  
830 of 10  $\mu$ L of 2X sample buffer. After boiling for 5 minutes, samples were analyzed by SDS-  
831 PAGE and autoradiography.

832 Permeabilization of thylakoid membranes was carried out as described previously  
833 (Ettinger and Theg, 1991). Washed thylakoids were prepared as done for protease treatment  
834 experiments described above. Samples at ~1 mg Chl/mL were mixed with an equal volume of  
835 buffer C (see above) containing 0.08% v/v Triton X-100 and incubated on ice in the dark for 10  
836 minutes. Thylakoid extracts were prepared as described above. For processing assays using  
837 permeabilized thylakoids (A) or thylakoid extracts (B), 8  $\mu$ L of enzyme sample was mixed with 1  
838  $\mu$ L of buffer containing 0.08% v/v Triton X-100 (A) or 0.5% v/v Triton X-100 (B) and 1  $\mu$ L of  
839 radiolabeled substrate protein. For pre-treatments, the buffer contained the indicated chemical at  
840 a 10X concentration. Samples were incubated at ~25°C for 30 mins in the dark.

841

#### 842 ***Reconstitution of T7-Plsp1 into liposomes***

843 Purified T7-Plsp1 in 0.25% v/v Triton X-100 was reconstituted into liposomes composed  
844 of *E. coli* total lipid extract or a mixture of thylakoid lipids (19.8 mol% MGDG, 54.9 mol%  
845 DGDG, 14.8 mol% SQDG, 10.5 mol% PG). All lipids were from Avanti Polar Lipids. Small  
846 unilamellar vesicles (SUVs) were prepared by resuspending dried lipids at 4 mg/mL in liposome  
847 buffer (50 mM Tris-HCl pH 8, 50 mM KCl, 10% glycerol) and sonicating with a probe sonicator  
848 until optical clarity was achieved. Metal fragments from the sonicator tip were removed by  
849 centrifugation at 17,000 x g for 2 minutes. SUVs were mixed with Triton X-100 at a mass ratio  
850 of 2:1 to saturate the vesicles with detergent (Rigaud and Levy, 2003). This mixture was  
851 incubated on ice for 15 minutes before adding purified T7-Plsp1 in 0.25% v/v Triton X-100 at a  
852 lipid to protein mass ratio of ~80:1. After mixing at 4°C for 30 minutes, the mixture was added  
853 to an amount of BioBeads SM-2 (BioRad) equal to approximately ten times the mass of Triton  
854 X-100 present. The supernatant was added to a second batch of BioBeads after 1 hour of mixing  
855 at 4°C and to a third batch after 2 hours of mixing at 4°C. The third BioBeads incubation was  
856 done at 4°C for 18-20 hours. BioBeads were removed using a Promega spin column, and the  
857 flow through was centrifuged at 250,000 x g for 30 minutes at 4°C. The transparent pellet was  
858 resuspended in 100  $\mu$ L of liposome buffer and then centrifuged at 16,000 x g for 2 minutes to  
859 remove any aggregates. The supernatant was used for *in vitro* processing assays, thermolysin  
860 treatments, or a carbonate wash (0.1 M Na<sub>2</sub>CO<sub>3</sub>).

861 For reconstitution experiments described in Figure S9, Plsp1 in 1% octyl glucoside was  
862 reduced with 50 mM DTT, and 50 mM DTT was present throughout the reconstitution procedure  
863 to maintain Plsp1 in a reduced state. PLs were pelleted as described above and resuspended in 70  
864  $\mu$ L of liposome buffer followed by centrifugation at 16,000 x g for 2 minutes to remove any  
865 aggregates. The supernatant was used for *in vitro* processing assays and thermolysin treatments.  
866 To confirm the redox state of Plsp1 before and after reconstitution, an aliquot was precipitated  
867 with 10% trichloroacetic acid followed by incubation in SDS-PAGE sample buffer (without  $\beta$ -  
868 ME) containing the thiol-specific reagent 4-Acetamido-4'-Maleimidylstilbene-2,2'-Disulfonic  
869 Acid (AMS) at a concentration of 10 mM.

870

871

872 **Acknowledgements:** This work was supported by the Office of Basic Energy Sciences of  
873 the U.S. Department of Energy (grant DE-SC0017035 to S.M.T. and grant DE-FG02-  
874 08ER15963 to K.I.), University of California Davis Department of Plant Sciences Graduate  
875 Student Research Assistantship (to L.J.M.), and a Henry A. Jastro Graduate Research Award (to  
876 L.J.M.)

877

878 **Competing interests:** The authors declare no competing interests related to this work.

879

880

881 **Figures and legends**

882

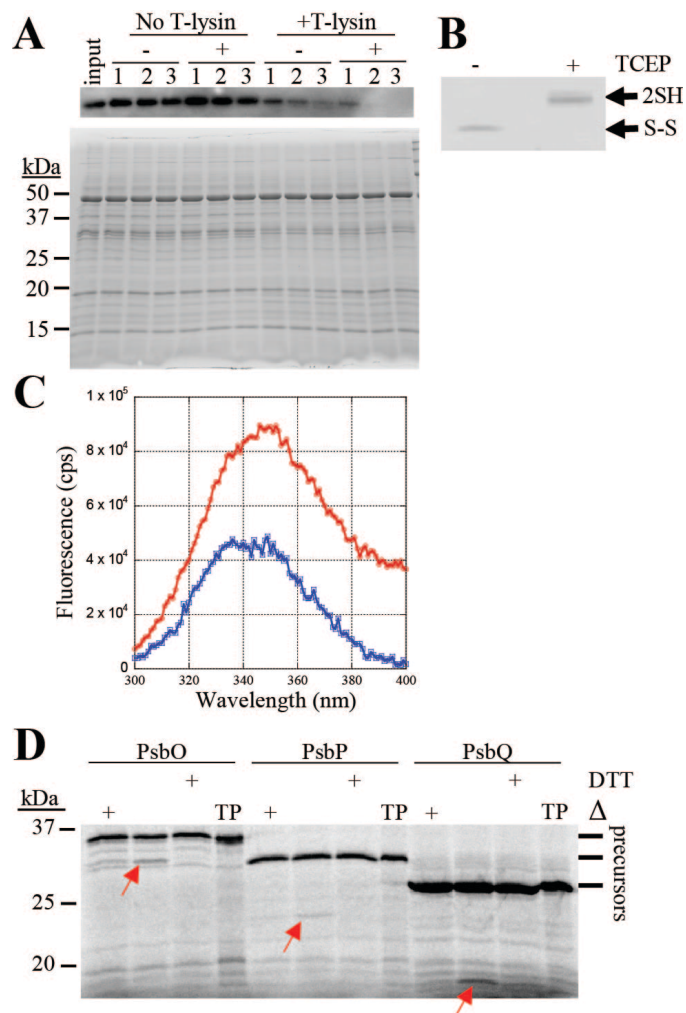

883

884

**Figure 1: Disulfide bond reduction alters the structure of Plsp1**

885 **(A)** Proteins extracted from Pea thylakoids with 0.25% v/v Triton X-100 were pre-treated with  
 886 (+) or without (-) 10 mM TCEP followed by incubation with or without thermolysin. Aliquots  
 887 taken at 10 (1), 20 (Boomer et al.), and 30 (3) minutes were analyzed by SDS-PAGE and  
 888 immunoblotting with an antibody against Pea Plsp1 (upper panel). A second gel was loaded with  
 889 half of the amount of each sample and stained with Coomassie Brilliant Blue after electrophoresis  
 890 (lower panel). Input = un-treated thylakoid extracts. **(B)** An aliquot of the +/- TCEP pre-treated  
 891 thylakoid extracts was analyzed by non-reducing SDS-PAGE and immunoblotting with the  
 892 antibody against Pea Plsp1. 2SH = reduced Plsp1. S-S = oxidized Plsp1. **(C)** Emission spectrum  
 893 of purified T7-Plsp1<sub>71-291</sub> (~0.1 μM) in 1% w/v octyl glucoside after pre-treatment with (Blue) or  
 894 without (Red) 50 mM DTT plotted as fluorescence in counts per second (cps) versus wavelength.  
 895 Shown are the spectra after subtracting those of buffer blanks. The excitation wavelength was  
 896 285 nm. **(D)** Processing activity of purified T7-Plsp1 against prPsbO, prPsbP, or prPsbQ. T7-  
 897 Plsp1 used in panel C was mixed with <sup>35</sup>S-Met-labeled substrates after being boiled for 10  
 898 minutes (Δ) or pre-treated with 50 mM DTT on ice for 20 minutes. Reaction mixtures were  
 899 incubated at ~25° C for 30 minutes and analyzed by SDS-PAGE and autoradiography. Arrows  
 900 denote the processed forms of each substrate tested. TP = translation products.

901

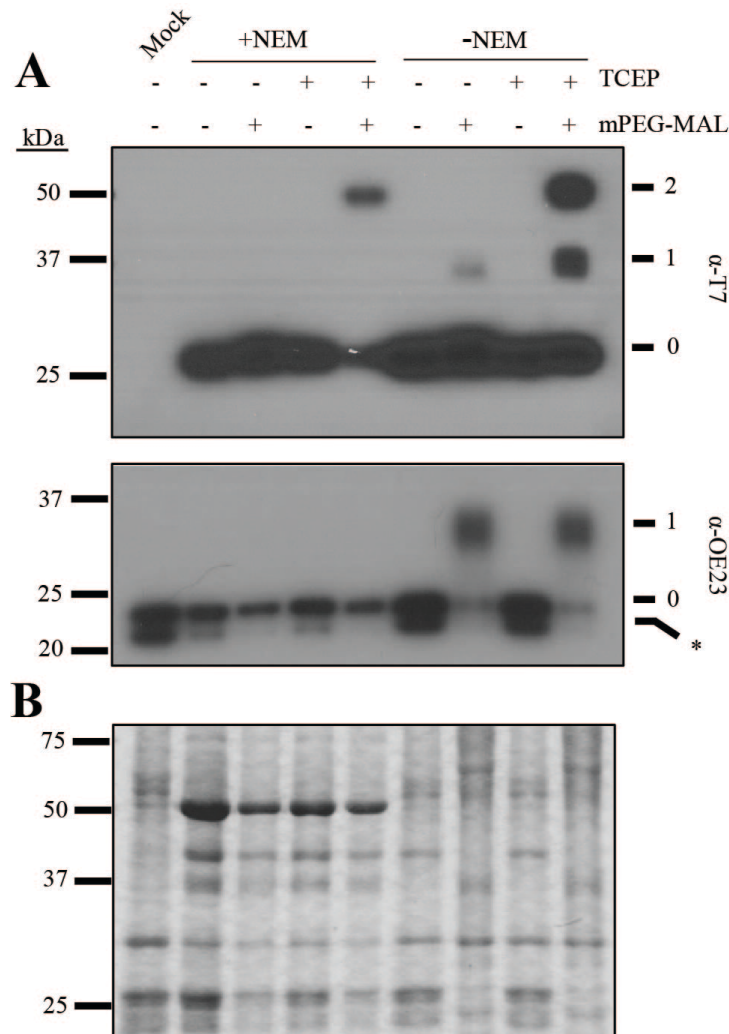

902  
903  
904  
905  
906  
907  
908  
909  
910  
911

**Figure 2. Plsp1 Cys form a disulfide bond in chloroplasts**

(A) PEG-MAL labeling of Cys in isolated chloroplast membranes. Thiol labeling was performed as described in Materials and Methods. Samples were analyzed by SDS-PAGE and immunoblotting using the  $\alpha$ -T7 antibody for detection of T7-Plsp1 (top panel) or the  $\alpha$ -OE23 antibody as a control (bottom panel). Unlabeled protein (0). 1 or 2 Cys residues labeled with mPEG-MAL, (1) and (Boomer et al.), respectively. Asterisk indicates unknown immunoreactive protein in *N. benthamiana* chloroplast membranes. (B) Coomassie-stained gel of the same samples analyzed in figure A

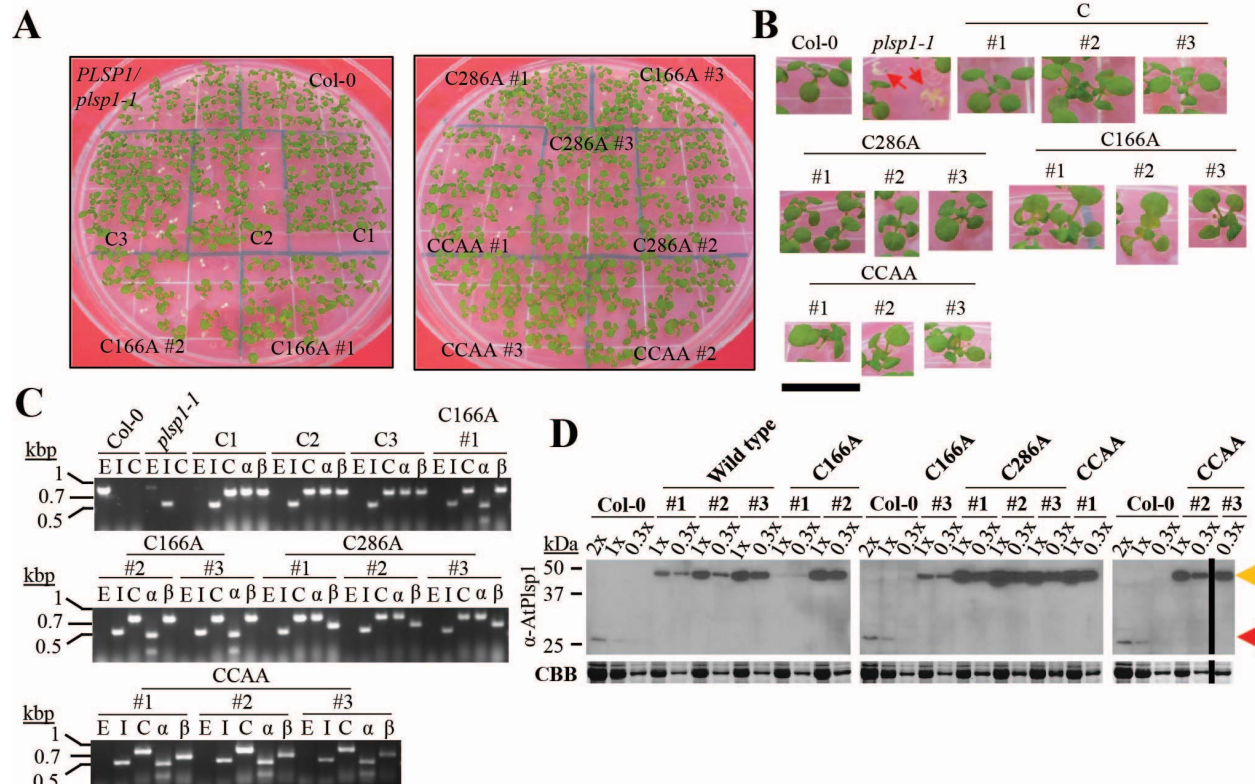

912  
913 **Figure 3. Expression of redox-inactive Citrine-Plsp1 variants rescues the *plsp1-1* knockout**  
914 **mutant**

915 (A) Images of 12 day-old seedlings growing on MS medium supplemented with 1% w/v sucrose.  
916 C = CITRINE-PLSP1, C166A = CITRINE-PLSP1-C166A, C286A = CITRINE-PLSP1-C286A,  
917 CCAA = CITRINE-PLSP1-C166A/C286A. (B) Close-up images of seedlings from panel A. Red  
918 arrows indicate *plsp1-1* null mutants. Scale bar represents 1cm. (C) Results of genomic PCR  
919 experiment to confirm seedling genotypes. E = *PLSP1*, I = *plsp1-1*, C = CITRINE-PLSP1, α =  
920 *PLSP1-C166A* (PstI digestion of C), β = *PLSP1-C286A* (PvuII digestion of C). (D) Expression of  
921 Citrine-Plsp1 proteins in isolated chloroplasts. Proteins from isolated chloroplasts were analyzed  
922 by SDS-PAGE and immunoblotting using the α-AtPlsp1 antibody. RbcL bands on duplicate gels  
923 stained with Coomassie Brilliant Blue (CBB) are shown below as a loading control. The vertical  
924 black bar separates non-adjacent lanes from the same membrane. 1X = 1 μg chlorophyll  
925 equivalent. Red and orange arrows indicate Plsp1 and Citrine-Plsp1, respectively.  
926

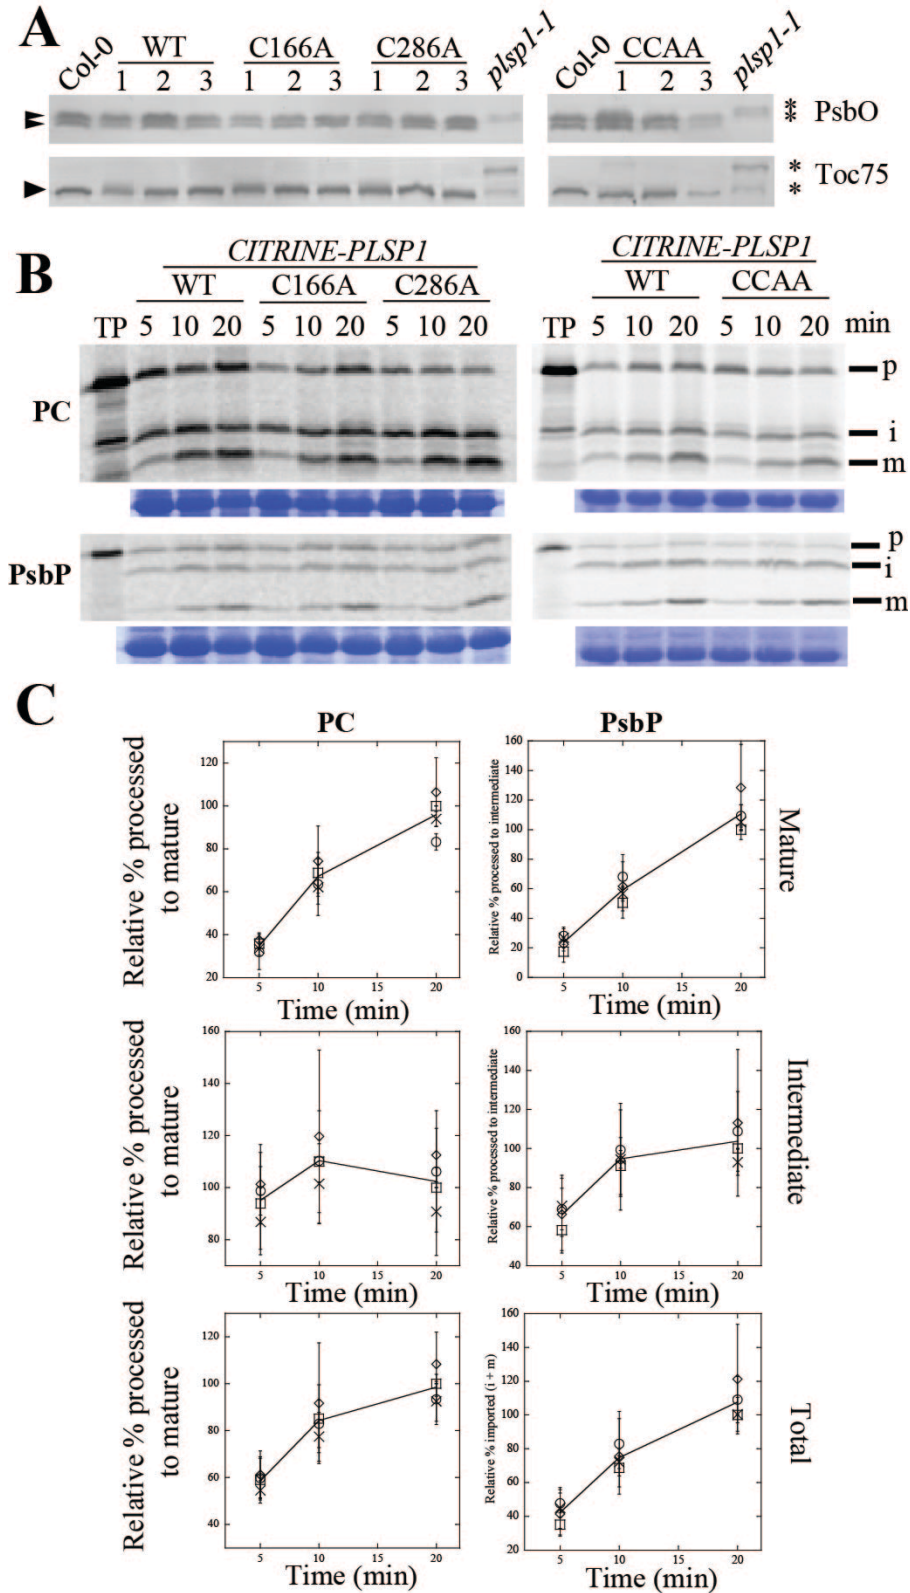

927  
928  
929  
930



931 were separated on 12% ( $\alpha$ -PsbO) or 7.5% ( $\alpha$ -Toc75) SDS-PAGE and detected by  
932 immunoblotting using antibodies stated at the right. Asterisks indicate unprocessed forms, and  
933 arrowheads indicate processed/mature form (s) of each protein. **(B)** Time course of in vitro  
934 import into isolated chloroplasts.  $^{35}$ S-Met-labeled forms of each precursor protein were incubated  
935 with isolated chloroplasts for 5, 10, or 20 minutes. Intact chloroplasts were re-isolated through a  
936 35% Percoll cushion and washed once in import buffer. A portion of the recovered chloroplasts  
937 was used for chlorophyll quantification to normalize gel loading, and the remainder was  
938 analyzed by SDS-PAGE and autoradiography. The lines used for the experiments are as follows:  
939 C #1, C166A #1, C286A #2, CCAA #2. Each import experiment was repeated three times using  
940 chloroplasts isolated on different days. RbcL bands on the CBB-stained gel are shown below as a  
941 loading control. P = precursor, i = intermediate, m = mature. PC = plastocyanin. **(C)**  
942 Quantification of the import products shown in B. Bands were quantified relative the  
943 corresponding wild type band at the 20 minute time point (i.e. wild type maximum). Show are  
944 the means  $\pm$  standard deviation of three biological replicates. The line in each graph is drawn  
945 through the average among all four lines at each time point. Squares, wild type; circles, C166A;  
946 diamonds, C286A; X, C166A/C286A.  
947

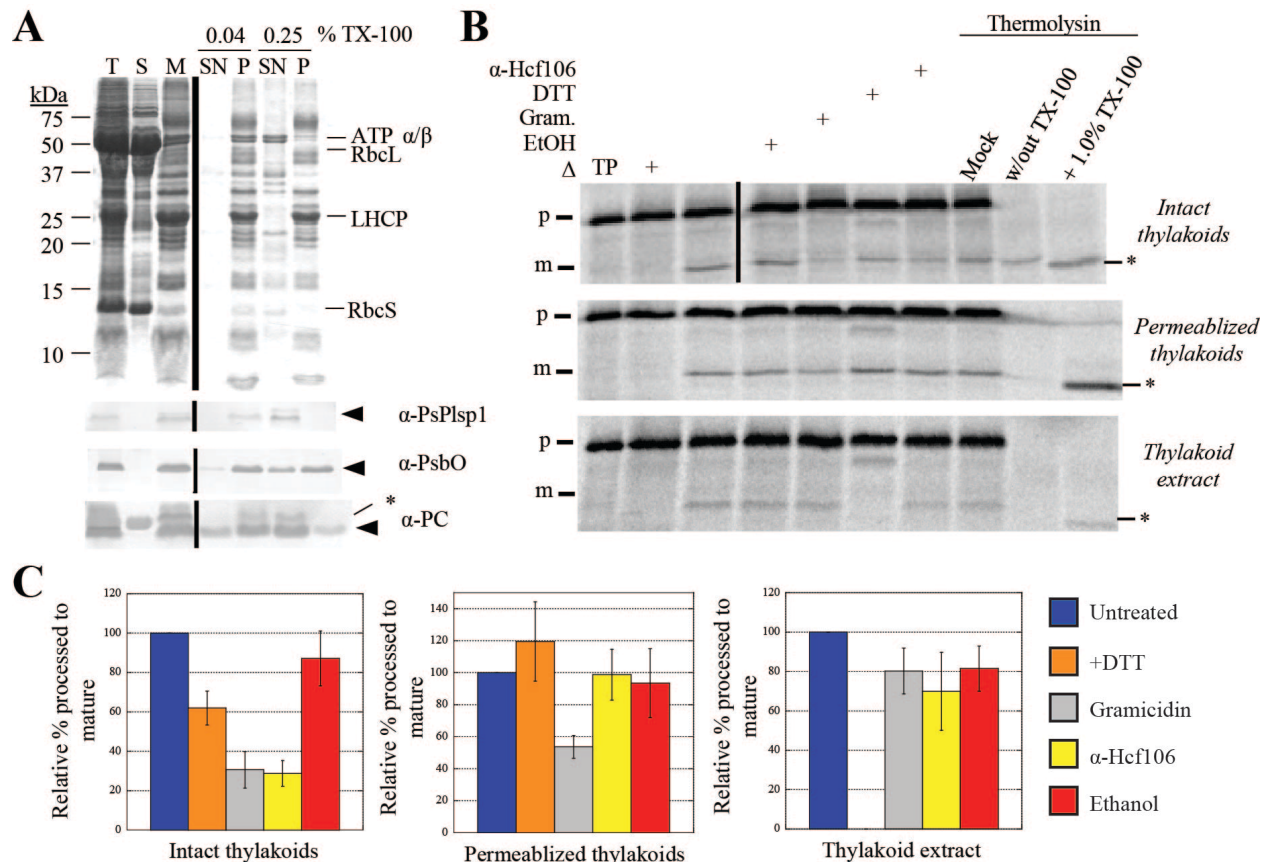

948  
 949 **Figure 5. Thylakoid membrane-bound processing activity is insensitive to DTT**  
 950 (A) SDS-PAGE analysis of Pea chloroplast fractions. Proteins were detected by CBB staining  
 951 (top panel) or immunoblotting (lower three panels) with the antibodies indicated at the right of  
 952 each panel. Arrowheads indicate proteins of interest, and asterisks indicate non-specific  
 953 immunoreactive bands. A volume equivalent to 4  $\mu$ g chlorophyll was loaded in each lane. T =  
 954 total chloroplasts, S = soluble fraction, M = membranes, SN = supernatant, P = pellet. (B)  
 955 Processing activity in Pea chloroplast membrane fractions depicted in A. 4  $\mu$ g chlorophyll  
 956 equivalents of each of the three fractions was pre-treated on ice for 30 minutes with reaction  
 957 buffer (control), 1% ethanol (EtOH), 30  $\mu$ M gramicidin (Li et al.) in 1% ethanol, 50 mM DTT, or  
 958 the  $\alpha$ -Hcf106 antibody. As a control, one sample of each chloroplast fraction was heat-  
 959 inactivated ( $\Delta$ ) at 82°C for 10 minutes prior to adding the substrate. After adding  $^{35}$ S-Met-  
 960 prPsbP, each reaction mixture was incubated in the dark at 28°C for 30 minutes. After the  
 961 incubation at 28°C, three additional control reactions were treated with 0.5 mM CaCl<sub>2</sub>,  
 962 thermolysin (0.1 mg/mL with 0.5 mM CaCl<sub>2</sub>), or thermolysin (0.1 mg/mL, with CaCl<sub>2</sub>) in the  
 963 presence of Triton X-100 (1% v/v) for 40 minutes on ice. Reaction mixtures were quenched by  
 964 adding an equal volume of 2X sample buffer containing 30 mM EDTA and boiling for 5  
 965 minutes. Samples were analyzed by SDS-PAGE and autoradiography. Asterisks indicate a  
 966 degradation product that was observed in some experiments. (C) ImageJ quantification of mature  
 967 PsbP bands shown in B. Values were normalized to the band intensity in the untreated sample  
 968 and are expressed as the mean  $\pm$  standard deviation of at least three independent experiments.  
 969

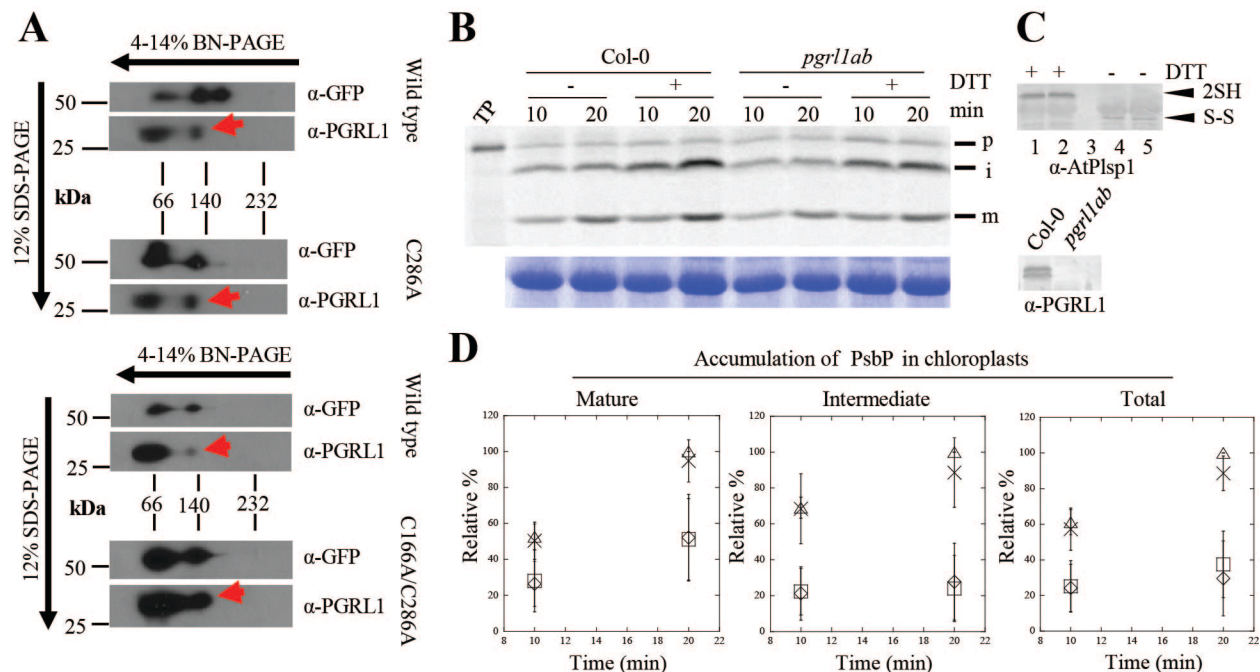

970  
 971 **Figure 6. Association with PGRL1 does not compensate for lack of Cys in Plsp1**  
 972 (A) 2D-BN/SDS-PAGE analysis of Arabidopsis chloroplasts complemented with Citrine-Plsp1,  
 973 Citrine-Plsp1-C286A, or Citrine-Plsp1-C166A/C286A. Total chloroplasts equivalent to 5 μg  
 974 (left) or 7.5 μg chlorophyll were solubilized with 1.3% w/v n-dodecyl-β-D-maltoside and run on  
 975 4-14% BN-PAGE gels. Lanes were then excised, heated at ~80°C for 30 minutes in denaturing  
 976 buffer (65 mM Tris-HCl pH 6.8, 3.3% SDS, 570 mM β-ME), and overlaid on 12% SDS-PAGE  
 977 gels. After electrophoresis, proteins were blotted to PVDF membranes. Membranes were cut at  
 978 ~37-kDa and probed with the GFP antibody (top) or the PGRL1 antibody (bottom). Red arrows  
 979 indicate the population of PGRL1 that co-migrates with Citrine-Plsp1. (B) Analysis of  
 980 processing activity during *in vitro* import. Chloroplasts pre-treated on ice for 30 mins with or  
 981 without 50 mM DTT were mixed with <sup>35</sup>S-Met-prPsbP and MgATP (3 mM final) and were  
 982 incubated in the light at 20°C for 10 or 20 minutes. Intact chloroplasts were re-isolated as  
 983 described in figure 3B and analyzed by autoradiography (top panel). RbcL bands from the CBB-  
 984 stained gels is shown as a loading control (bottom panel). (C) Immunoblotting analysis of  
 985 chloroplasts used for *in vitro* import experiments. (Upper panel), An aliquot of chloroplasts  
 986 treated with or without 50 mM DTT prior to *in vitro* import were mixed with non-reducing (no  
 987 β-ME) sample loading buffer and analyzed by SDS-PAGE and immunoblotting using the  
 988 antibody against Arabidopsis Plsp1. "2SH" and "S-S" indicate the reduced and oxidized forms of  
 989 Plsp1, respectively. 1 and 4 = Col-0, 2 and 5 = *pgrl1lab*, 3 = blank. (Lower panel), Chloroplasts  
 990 used for import experiments were analyzed by SDS-PAGE and immunoblotting using the  
 991 PGRL1 antibody. (D) Quantification of import products shown in C. Bands were quantified  
 992 relative to the corresponding band (s) in the Col-0 + DTT sample at 20 minutes which was set as  
 993 100%. Data are expressed as the mean ± standard deviation of three independent experiments.  
 994 Squares, wild type - DTT; triangles, wild type + DTT; diamonds, *pgrl1lab* - DTT; X, *pgrl1lab* +  
 995 DTT.  
 996

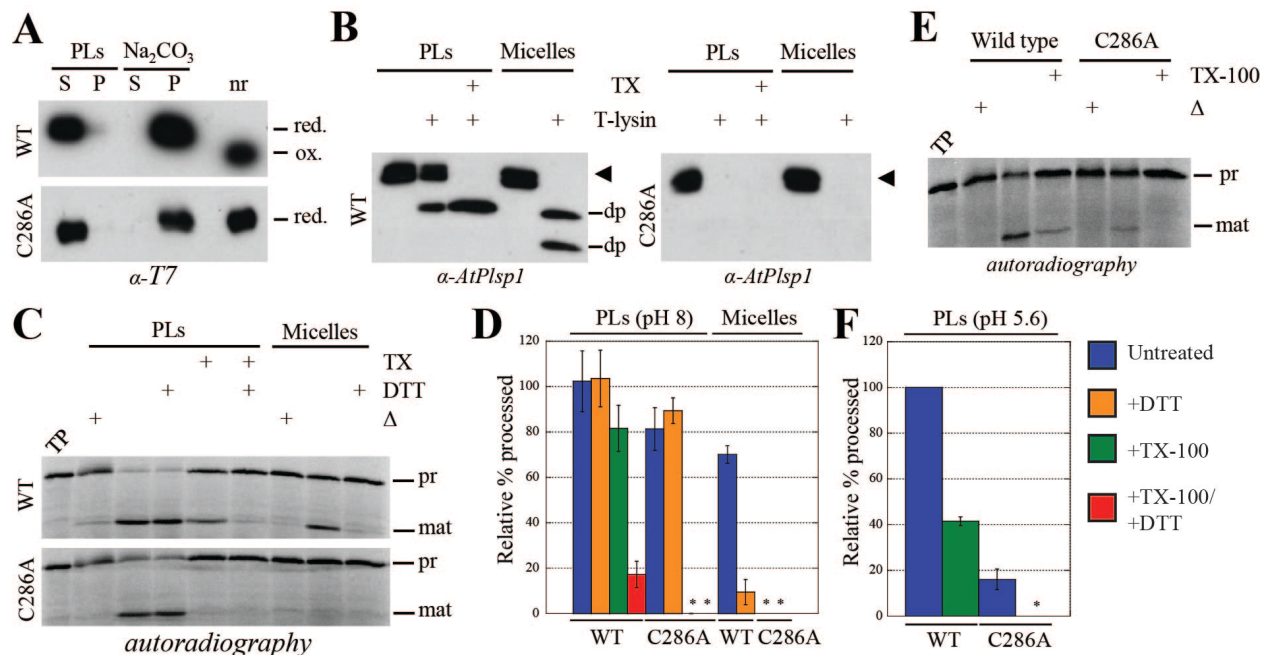

997  
998  
999

**Figure 7. Reconstitution into thylakoid lipid vesicles recovers the activity of redox-inactive Plsp1 in a pH-dependent manner**

1000 (A) T7-Plsp1 (wild type or C286A) was purified in 0.25% Triton X-100 (micelles, final pH~7.5)  
 1001 and reconstituted into liposomes to yield proteoliposomes (PLs) and were then divided into  
 1002 soluble (S) and pellet (P) fractions by centrifugation as described in Materials in Methods. The  
 1003 soluble fraction was treated with 0.1 M Na<sub>2</sub>CO<sub>3</sub> for 5 minutes on ice and then subjected to  
 1004 ultracentrifugation to yield soluble and pellet fractions. nr = aliquot run in non-reducing sample  
 1005 buffer. Samples were analyzed by SDS-PAGE and immunoblotting. (B) PLs at pH 8 were  
 1006 subjected to treatment with thermolysin (10 μg/mL with 0.5 mM CaCl<sub>2</sub>) with or without 2%  
 1007 Triton X-100 (TX) at 25°C for 40 minutes. Samples were analyzed by SDS-PAGE and  
 1008 immunoblotting. The arrowhead indicates the T7-Plsp1 doublet, and “dp” indicates degradation  
 1009 products observed after thermolysin treatment. (C) PLs at pH 8 were pre-treated with or without  
 1010 50 mM DTT and/or 2% Triton X-100 (TX) for 30 minutes on ice followed by incubation with  
 1011 <sup>35</sup>S-prPsbP for 30 minutes at 25°C. As a control, 60 nM purified T7-Plsp1 pre-treated with or  
 1012 without 50 mM DTT was included. Samples were analyzed by SDS-PAGE and autoradiography.  
 1013 Δ = boiled for 10 minutes prior to adding substrate. TP = translation product. (D) Quantification  
 1014 of mature PsbP bands in C relative to the TP on the same gel. Shown are the means ± standard  
 1015 deviation from three independent experiments. WT = wild type. Asterisks indicate undetectable  
 1016 activity. (E) PLs resuspended in MES liposome buffer at pH 5.6 were assayed for processing  
 1017 activity. (F) Quantification of mature PsbP bands in E relative to wild type -TX-100. Shown are  
 1018 the means ± standard deviation from three independent experiments.  
 1019

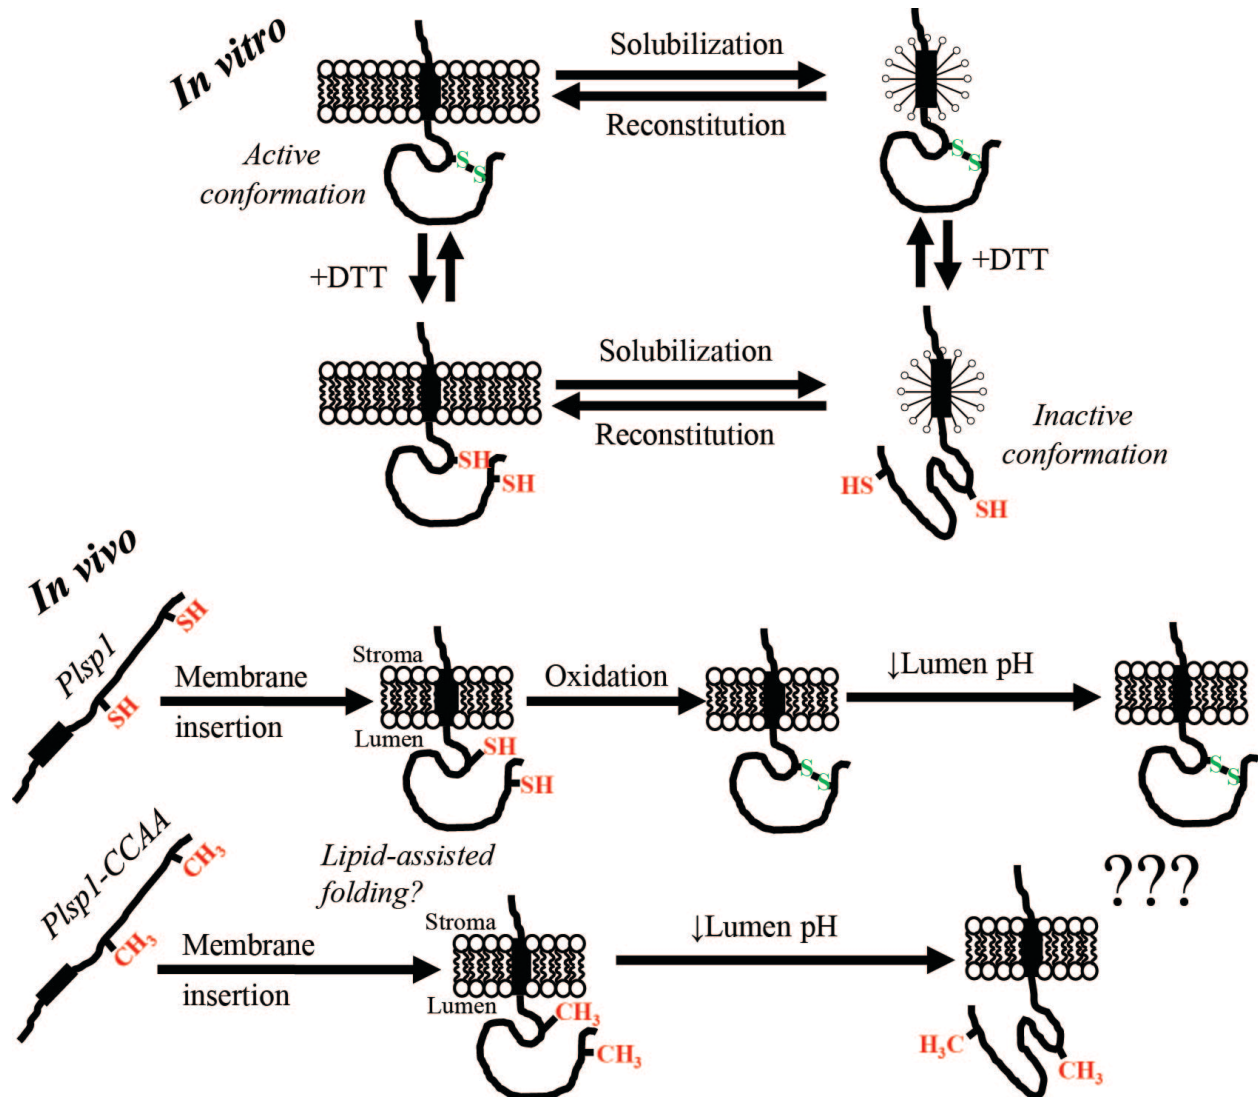

1020  
1021  
1022  
1023  
1024  
1025  
1026  
1027  
1028  
1029  
1030  
1031  
1032

**Figure 8. *In vitro* and *in vivo* models**

*(In vitro)* Plsp1 is solubilized in from membranes in an active form due to an intramolecular disulfide bond. Reduction of this disulfide bond causes an inactivating conformational change in detergent micelles that is prevented by association with a lipid bilayer. Reconstitution of Plsp1 into a bilayer causes refolding back into the active state. *(In vivo)* Plsp1 is targeted to thylakoids in a reduced form. Once the catalytic domain traverses the membrane, folding into the catalytically active form is assisted by bilayer lipids. In the case of the wild-type protein, oxidation to form the disulfide bond then takes place and stabilizes the structure. Structural stabilization by the disulfide bond allows Plsp1 to remain optimally active amidst fluctuations in the lumen pH.

## 1033 **References**

- 1034
- 1035 **Albiniak, A.M., Baglieri, J., and Robinson, C.** (2012). Targeting of luminal proteins across the  
1036 thylakoid membrane. *Journal of experimental botany* **63**:1689-1698.
- 1037 **Armbruster, U., Correa Galvis, V., Kunz, H.H., and Strand, D.D.** (2017). The regulation of  
1038 the chloroplast proton motive force plays a key role for photosynthesis in fluctuating  
1039 light. *Current opinion in plant biology* **37**:56-62.
- 1040 **Arnon, D.I.** (1949). Copper Enzymes in Isolated Chloroplasts. Polyphenoloxidase in Beta  
1041 Vulgaris. *Plant physiology* **24**:1-15.
- 1042 **Balsera, M., Uberegui, E., Schurmann, P., and Buchanan, B.B.** (2014). Evolutionary  
1043 Development of Redox Regulation in Chloroplasts. *Antioxidants & redox signaling*.
- 1044 **Bekard, I., and Dunstan, D.E.** (2014). Electric field induced changes in protein conformation.  
1045 *Soft Matter* **10**:431-437.
- 1046 **Betz, S.F.** (1993). Disulfide bonds and the stability of globular proteins. *Protein science : a*  
1047 *publication of the Protein Society* **2**:1551-1558.
- 1048 **Bhanu, M.K., and Kendall, D.A.** (2014). Fluorescence spectroscopy of soluble E. coli SPase I  
1049 Delta2-75 reveals conformational changes in response to ligand binding. *Proteins* **82**:596-  
1050 606.
- 1051 **Bogdanov, M., and Dowhan, W.** (1999). Lipid-assisted protein folding. *The Journal of*  
1052 *biological chemistry* **274**:36827-36830.
- 1053 **Bolter, B., Soll, J., and Schwenkert, S.** (2015). Redox meets protein trafficking. *Biochimica et*  
1054 *biophysica acta* **1847**:949-956.
- 1055 **Boomer, J.S., To, K., Chang, K.C., Takasu, O., Osborne, D.F., Walton, A.H., Bricker, T.L.,**  
1056 **Jarman, S.D., 2nd, Kreisel, D., Krupnick, A.S., et al.** (2011). Immunosuppression in  
1057 patients who die of sepsis and multiple organ failure. *Jama* **306**:2594-2605.
- 1058 **Bradford, M.M.** (1976). A rapid and sensitive method for the quantitation of microgram  
1059 quantities of protein utilizing the principle of protein-dye binding. *Analytical*  
1060 *biochemistry* **72**:248-254.
- 1061 **Braun, N.A., and Theg, S.M.** (2008). The chloroplast Tat pathway transports substrates in the  
1062 dark. *The Journal of biological chemistry* **283**:8822-8828.
- 1063 **Brooks, M.D., Sylak-Glassman, E.J., Fleming, G.R., and Niyogi, K.K.** (2013). A thioredoxin-  
1064 like/beta-propeller protein maintains the efficiency of light harvesting in Arabidopsis.  
1065 *Proceedings of the National Academy of Sciences of the United States of America*  
1066 **110**:E2733-2740.
- 1067 **Catterall, W.A., Wisedchaisri, G., and Zheng, N.** (2017). The chemical basis for electrical  
1068 signaling. *Nature chemical biology* **13**:455-463.
- 1069 **Choi, H., Kim, S., Mukhopadhyay, P., Cho, S., Woo, J., Storz, G., and Ryu, S.E.** (2001).  
1070 Structural basis of the redox switch in the OxyR transcription factor. *Cell* **105**:103-113.
- 1071 **Cornell, N.W., and Crivaro, K.E.** (1972). Stability constant for the zinc-dithiothreitol complex.  
1072 *Analytical biochemistry* **47**:203-208.
- 1073 **Cruz, J.A., Sacksteder, C.A., Kanazawa, A., and Kramer, D.M.** (2001). Contribution of  
1074 electric field (Delta psi) to steady-state transthylakoid proton motive force (pmf) in vitro  
1075 and in vivo. control of pmf parsing into Delta psi and Delta pH by ionic strength.  
1076 *Biochemistry* **40**:1226-1237.
- 1077 **D'Amico, S., Marx, J.C., Gerday, C., and Feller, G.** (2003). Activity-stability relationships in  
1078 extremophilic enzymes. *The Journal of biological chemistry* **278**:7891-7896.

- 1079 **Dalbey, R.E., Wang, P., and van Dijl, J.M.** (2012). Membrane proteases in the bacterial  
1080 protein secretion and quality control pathway. *Microbiology and molecular biology*  
1081 *reviews : MMBR* **76**:311-330.
- 1082 **DalCorso, G., Pesaresi, P., Masiero, S., Aseeva, E., Schunemann, D., Finazzi, G., Joliot, P.,**  
1083 **Barbato, R., and Leister, D.** (2008). A complex containing PGRL1 and PGR5 is  
1084 involved in the switch between linear and cyclic electron flow in *Arabidopsis*. *Cell*  
1085 **132**:273-285.
- 1086 **Dormann, P., and Benning, C.** (2002). Galactolipids rule in seed plants. *Trends in plant science*  
1087 **7**:112-118.
- 1088 **Dowhan, W., Mileykovskaya, E., and Bogdanov, M.** (2004). Diversity and versatility of lipid-  
1089 protein interactions revealed by molecular genetic approaches. *Biochimica et biophysica*  
1090 *acta* **1666**:19-39.
- 1091 **Endow, J.K., and Inoue, K.** (2013). Stable complex formation of thylakoidal processing  
1092 peptidase and PGRL1. *FEBS letters* **587**:2226-2231.
- 1093 **Endow, J.K., Singhal, R., Fernandez, D.E., and Inoue, K.** (2015). Chaperone-Assisted Post-  
1094 Translational Transport of Plastidic Type I Signal Peptidase 1. *The Journal of biological*  
1095 *chemistry* **290**:28778-28791.
- 1096 **Ettinger, W.F., and Theg, S.M.** (1991). Physiologically active chloroplasts contain pools of  
1097 unassembled extrinsic proteins of the photosynthetic oxygen-evolving enzyme complex  
1098 in the thylakoid lumen. *The Journal of cell biology* **115**:321-328.
- 1099 **Gopalan, G., He, Z., Battaile, K.P., Luan, S., and Swaminathan, K.** (2006). Structural  
1100 comparison of oxidized and reduced FKBP13 from *Arabidopsis thaliana*. *Proteins*  
1101 **65**:789-795.
- 1102 **Hager, A., and Holocher, K.** (1993). Localization of the xanthophyll-cycle enzyme  
1103 violaxanthin de-epoxidase within the thylakoid lumen and abolition of its mobility by a  
1104 (light-dependent) pH decrease. *Planta* **192**:581-589.
- 1105 **Hall, M., Mata-Cabana, A., Akerlund, H.E., Florencio, F.J., Schroder, W.P., Lindahl, M.,**  
1106 **and Kieselbach, T.** (2010). Thioredoxin targets of the plant chloroplast lumen and their  
1107 implications for plastid function. *Proteomics* **10**:987-1001.
- 1108 **Hamsanathan, S., and Musser, S.M.** (2018). The Tat protein transport system: intriguing  
1109 questions and conundrums. *FEMS microbiology letters* **365**.
- 1110 **Hansen, S.B., Tao, X., and MacKinnon, R.** (2011). Structural basis of PIP2 activation of the  
1111 classical inward rectifier K<sup>+</sup> channel Kir2.2. *Nature* **477**:495-498.
- 1112 **Hsu, S.C., Endow, J.K., Ruppel, N.J., Roston, R.L., Baldwin, A.J., and Inoue, K.** (2011).  
1113 Functional diversification of thylakoidal processing peptidases in *Arabidopsis thaliana*.  
1114 *PloS one* **6**:e27258.
- 1115 **Jahns, P., Latowski, D., and Strzalka, K.** (2009). Mechanism and regulation of the  
1116 violaxanthin cycle: the role of antenna proteins and membrane lipids. *Biochimica et*  
1117 *biophysica acta* **1787**:3-14.
- 1118 **Jiang, Z., You, L., Dou, W., Sun, T., and Xu, P.** (2019). Effects of an Electric Field on the  
1119 Conformational Transition of the Protein: A Molecular Dynamics Simulation Study.  
1120 *Polymers (Basel)* **11**.
- 1121 **Karamoko, M., Gabilly, S.T., and Hamel, P.P.** (2013). Operation of trans-thylakoid thiol-  
1122 metabolizing pathways in photosynthesis. *Frontiers in plant science* **4**:476.
- 1123 **Kelkar, D.A., and Chattopadhyay, A.** (2007). The gramicidin ion channel: a model membrane  
1124 protein. *Biochimica et biophysica acta* **1768**:2011-2025.

- 1125 **Kieselbach, T.** (2013). Oxidative folding in chloroplasts. *Antioxidants & redox signaling* **19**:72-  
1126 82.
- 1127 **Kieselbach, T., and Schroder, W.P.** (2003). The proteome of the chloroplast lumen of higher  
1128 plants. *Photosynthesis research* **78**:249-264.
- 1129 **Kirwin, P.M., Elderfield, P.D., Williams, R.S., and Robinson, C.** (1988). Transport of  
1130 proteins into chloroplasts. Organization, orientation, and lateral distribution of the  
1131 plastocyanin processing peptidase in the thylakoid network. *The Journal of biological*  
1132 *chemistry* **263**:18128-18132.
- 1133 **Kleinschmidt, J.H.** (2015). Folding of beta-barrel membrane proteins in lipid bilayers -  
1134 Unassisted and assisted folding and insertion. *Biochimica et biophysica acta* **1848**:1927-  
1135 1943.
- 1136 **Lakey, J.H., Massotte, D., Heitz, F., Dasseux, J.L., Faucon, J.F., Parker, M.W., and Pattus,**  
1137 **F.** (1991). Membrane insertion of the pore-forming domain of colicin A. A spectroscopic  
1138 study. *European journal of biochemistry / FEBS* **196**:599-607.
- 1139 **Last, D.I., and Gray, J.C.** (1989). Plastocyanin is encoded by a single-copy gene in the pea  
1140 haploid genome. *Plant molecular biology* **12**:655-666.
- 1141 **Latowski, D., Akerlund, H.E., and Strzalka, K.** (2004). Violaxanthin de-epoxidase, the  
1142 xanthophyll cycle enzyme, requires lipid inverted hexagonal structures for its activity.  
1143 *Biochemistry* **43**:4417-4420.
- 1144 **Latowski, D., Kostecka, A., and Strzalka, K.** (2000). Effect of monogalactosyldiacylglycerol  
1145 and other thylakoid lipids on violaxanthin de-epoxidation in liposomes. *Biochemical*  
1146 *Society transactions* **28**:810-812.
- 1147 **Latowski, D., Kruk, J., Burda, K., Skrzynecka-Jaskier, M., Kostecka-Gugala, A., and**  
1148 **Strzalka, K.** (2002). Kinetics of violaxanthin de-epoxidation by violaxanthin de-  
1149 epoxidase, a xanthophyll cycle enzyme, is regulated by membrane fluidity in model lipid  
1150 bilayers. *European journal of biochemistry / FEBS* **269**:4656-4665.
- 1151 **Lee, A.G.** (2004). How lipids affect the activities of integral membrane proteins. *Biochimica et*  
1152 *biophysica acta* **1666**:62-87.
- 1153 **Lee, A.G.** (2011). Biological membranes: the importance of molecular detail. *Trends in*  
1154 *biochemical sciences* **36**:493-500.
- 1155 **Li, L., Park, E., Ling, J., Ingram, J., Ploegh, H., and Rapoport, T.A.** (2016). Crystal structure  
1156 of a substrate-engaged SecY protein-translocation channel. *Nature* **531**:395-399.
- 1157 **Liu, C., Gao, Z., Liu, K., Sun, R., Cui, C., Holzwarth, A.R., and Yang, C.** (2016).  
1158 Simultaneous refolding of denatured PsbS and reconstitution with LHCII into liposomes  
1159 of thylakoid lipids. *Photosynthesis research* **127**:109-116.
- 1160 **Mant, A., Nielsen, V.S., Knott, T.G., Moller, B.L., and Robinson, C.** (1994). Multiple  
1161 mechanisms for the targeting of photosystem I subunits F, H, K, L, and N into and across  
1162 the thylakoid membrane. *The Journal of biological chemistry* **269**:27303-27309.
- 1163 **Mel, S.F., and Stroud, R.M.** (1993). Colicin Ia inserts into negatively charged membranes at  
1164 low pH with a tertiary but little secondary structural change. *Biochemistry* **32**:2082-2089.
- 1165 **Michl, D., Robinson, C., Shackleton, J.B., Herrmann, R.G., and Klosgen, R.B.** (1994).  
1166 Targeting of proteins to the thylakoids by bipartite presequences: CFoII is imported by a  
1167 novel, third pathway. *The EMBO journal* **13**:1310-1317.
- 1168 **Midorikawa, T., Endow, J.K., Dufour, J., Zhu, J., and Inoue, K.** (2014). Plastidic type I  
1169 signal peptidase 1 is a redox-dependent thylakoidal processing peptidase. *The Plant*  
1170 *journal : for cell and molecular biology* **80**:592-603.



- 1171 **Midorikawa, T., and Inoue, K.** (2013). Multiple fates of non-mature luminal proteins in  
1172 thylakoids. *The Plant journal : for cell and molecular biology* **76**:73-86.
- 1173 **Nishii, W., Kukimoto-Niino, M., Terada, T., Shirouzu, M., Muramatsu, T., Kojima, M.,**  
1174 **Kihara, H., and Yokoyama, S.** (2015). A redox switch shapes the Lon protease exit pore  
1175 to facultatively regulate proteolysis. *Nature chemical biology* **11**:46-51.
- 1176 **Niyogi, K.K., Li, X.P., Rosenberg, V., and Jung, H.S.** (2005). Is PsbS the site of non-  
1177 photochemical quenching in photosynthesis? *Journal of experimental botany* **56**:375-382.
- 1178 **Nott, T.J., Kelly, G., Stach, L., Li, J., Westcott, S., Patel, D., Hunt, D.M., Howell, S.,**  
1179 **Buxton, R.S., O'Hare, H.M., et al.** (2009). An intramolecular switch regulates  
1180 phosphoindependent FHA domain interactions in *Mycobacterium tuberculosis*. *Sci Signal*  
1181 **2**:ra12.
- 1182 **Paetzel, M.** (2014). Structure and mechanism of *Escherichia coli* type I signal peptidase.  
1183 *Biochimica et biophysica acta* **1843**:1497-1508.
- 1184 **Paetzel, M., Karla, A., Strynadka, N.C., and Dalbey, R.E.** (2002). Signal peptidases.  
1185 *Chemical reviews* **102**:4549-4580.
- 1186 **Peltier, J.B., Emanuelsson, O., Kalume, D.E., Ytterberg, J., Friso, G., Rudella, A., Liberles,**  
1187 **D.A., Soderberg, L., Roepstorff, P., von Heijne, G., et al.** (2002). Central functions of  
1188 the luminal and peripheral thylakoid proteome of *Arabidopsis* determined by  
1189 experimentation and genome-wide prediction. *The Plant cell* **14**:211-236.
- 1190 **Pilon, M., de Kruijff, B., and Weisbeek, P.J.** (1992). New insights into the import mechanism  
1191 of the ferredoxin precursor into chloroplasts. *The Journal of biological chemistry*  
1192 **267**:2548-2556.
- 1193 **Pretzer, D., Schulteis, B., Vander Velde, D.G., Smith, C.D., Mitchell, J.W., and Manning,**  
1194 **M.C.** (1992). Effect of zinc binding on the structure and stability of fibrolase, a  
1195 fibrinolytic protein from snake venom. *Pharm Res* **9**:870-877.
- 1196 **Rigaud, J.L., and Levy, D.** (2003). Reconstitution of membrane proteins into liposomes.  
1197 *Methods in enzymology* **372**:65-86.
- 1198 **Rodrigues, R.A., Silva-Filho, M.C., and Cline, K.** (2011). FtsH2 and FtsH5: two homologous  
1199 subunits use different integration mechanisms leading to the same thylakoid multimeric  
1200 complex. *The Plant journal : for cell and molecular biology* **65**:600-609.
- 1201 **Schmidt, B., Ho, L., and Hogg, P.J.** (2006). Allosteric disulfide bonds. *Biochemistry* **45**:7429-  
1202 7433.
- 1203 **Schubert, M., Petersson, U.A., Haas, B.J., Funk, C., Schroder, W.P., and Kieselbach, T.**  
1204 (2002). Proteome map of the chloroplast lumen of *Arabidopsis thaliana*. *The Journal of*  
1205 *biological chemistry* **277**:8354-8365.
- 1206 **Seiwert, D., Witt, H., Janshoff, A., and Paulsen, H.** (2017). The non-bilayer lipid MGDG  
1207 stabilizes the major light-harvesting complex (LHCII) against unfolding. *Scientific*  
1208 *reports* **7**:5158.
- 1209 **Shapiguzov, A., Chai, X., Fucile, G., Longoni, P., Zhang, L., and Rochaix, J.D.** (2016).  
1210 Activation of the Stt7/STN7 kinase through dynamic interactions with the cytochrome  
1211 b6f complex. *Plant physiology*.
- 1212 **Shi, L.X., and Theg, S.M.** (2013). The chloroplast protein import system: from algae to trees.  
1213 *Biochimica et biophysica acta* **1833**:314-331.
- 1214 **Shikanai, T., and Yamamoto, H.** (2017). Contribution of Cyclic and Pseudo-cyclic Electron  
1215 Transport to the Formation of Proton Motive Force in Chloroplasts. *Molecular plant*  
1216 **10**:20-29.

- 1217 **Shipman, R.L., and Inoue, K.** (2009). Suborganellar localization of plastidic type I signal  
1218 peptidase 1 depends on chloroplast development. *FEBS letters* **583**:938-942.
- 1219 **Shipman-Roston, R.L., Ruppel, N.J., Damoc, C., Phinney, B.S., and Inoue, K.** (2010). The  
1220 significance of protein maturation by plastidic type I signal peptidase 1 for thylakoid  
1221 development in *Arabidopsis* chloroplasts. *Plant physiology* **152**:1297-1308.
- 1222 **Simionato, D., Basso, S., Zaffagnini, M., Lana, T., Marzotto, F., Trost, P., and Morosinotto,**  
1223 **T.** (2015). Protein redox regulation in the thylakoid lumen: the importance of disulfide  
1224 bonds for violaxanthin de-epoxidase. *FEBS letters* **589**:919-923.
- 1225 **Soom, M., Schonherr, R., Kubo, Y., Kirsch, C., Klinger, R., and Heinemann, S.H.** (2001).  
1226 Multiple PIP2 binding sites in Kir2.1 inwardly rectifying potassium channels. *FEBS*  
1227 *letters* **490**:49-53.
- 1228 **Stangl, M., and Schneider, D.** (2015). Functional competition within a membrane: Lipid  
1229 recognition vs. transmembrane helix oligomerization. *Biochimica et biophysica acta*  
1230 **1848**:1886-1896.
- 1231 **Strand, D.D., Fisher, N., Davis, G.A., and Kramer, D.M.** (2016). Redox regulation of the  
1232 antimycin A sensitive pathway of cyclic electron flow around photosystem I in higher  
1233 plant thylakoids. *Biochimica et biophysica acta* **1857**:1-6.
- 1234 **Sung, M., and Dalbey, R.E.** (1992). Identification of potential active-site residues in the  
1235 *Escherichia coli* leader peptidase. *The Journal of biological chemistry* **267**:13154-13159.
- 1236 **Tanaka, S., and Wada, K.** (1988). The status of cysteine residues in the extrinsic 33 kDa  
1237 protein of spinach photosystem II complexes. *Photosynthesis research* **17**:255-266.
- 1238 **Teale, F.W.J.** (1960). Ultraviolet Fluorescence of Proteins in Neutral Solution. *Biochemical*  
1239 *Journal* **76**:381-388.
- 1240 **Thornton, J.M.** (1981). Disulphide bridges in globular proteins. *Journal of molecular biology*  
1241 **151**:261-287.
- 1242 **Tschantz, W.R., Paetzel, M., Cao, G., Suci, D., Inouye, M., and Dalbey, R.E.** (1995).  
1243 Characterization of a soluble, catalytically active form of *Escherichia coli* leader  
1244 peptidase: requirement of detergent or phospholipid for optimal activity. *Biochemistry*  
1245 **34**:3935-3941.
- 1246 **Umena, Y., Kawakami, K., Shen, J.R., and Kamiya, N.** (2011). Crystal structure of oxygen-  
1247 evolving photosystem II at a resolution of 1.9 Å. *Nature* **473**:55-60.
- 1248 **van den Burg, B.** (2003). Extremophiles as a source for novel enzymes. *Curr Opin Microbiol*  
1249 **6**:213-218.
- 1250 **van der Goot, F.G., Gonzalez-Manas, J.M., Lakey, J.H., and Pattus, F.** (1991). A 'molten-  
1251 globule' membrane-insertion intermediate of the pore-forming domain of colicin A.  
1252 *Nature* **354**:408-410.
- 1253 **van Klompenburg, W., Paetzel, M., de Jong, J.M., Dalbey, R.E., Demel, R.A., von Heijne,**  
1254 **G., and de Kruijff, B.** (1998). Phosphatidylethanolamine mediates insertion of the  
1255 catalytic domain of leader peptidase in membranes. *FEBS letters* **431**:75-79.
- 1256 **Voinnet, O., Rivas, S., Mestre, P., and Baulcombe, D.** (2003). An enhanced transient  
1257 expression system in plants based on suppression of gene silencing by the p19 protein of  
1258 tomato bushy stunt virus. *The Plant journal : for cell and molecular biology* **33**:949-956.
- 1259 **Webb, M.S., and Green, B.R.** (1991). Biochemical and biophysical properties of thylakoid acyl  
1260 lipids. *Biochimica et biophysica acta* **1060**:133-158.
- 1261 **Wei, X., Su, X., Cao, P., Liu, X., Chang, W., Li, M., Zhang, X., and Liu, Z.** (2016). Structure  
1262 of spinach photosystem II-LHCII supercomplex at 3.2 Å resolution. *Nature* **534**:69-74.

1263 **Zhbanko, M., Zinchenko, V., Gutensohn, M., Schierhorn, A., and Klossgen, R.B. (2005).**  
1264 Inactivation of a predicted leader peptidase prevents photoautotrophic growth of  
1265 *Synechocystis* sp. strain PCC 6803. *Journal of bacteriology* **187**:3071-3078.  
1266
